# 1 Cellular-resolution gene expression 2 mapping reveals organization in the 3 head ganglia of the gastropod, 4 *Berghia stephanieae*

5 M. Desmond Ramirez<sup>1\*</sup>, Thi N. Bui<sup>2,3</sup>, Paul S. Katz<sup>2\*,3</sup>

\*For correspondence:

[dra@uoregon.edu](mailto:dra@uoregon.edu) (MDR);  
[pkatz@umass.edu](mailto:pkatz@umass.edu) (PSK)

6 <sup>1</sup>Institute of Neuroscience, University of Oregon, United States; <sup>2</sup>Department of Biology,  
7 University of Massachusetts-Amherst, United States; <sup>3</sup>Neuroscience and Behavior  
8 Graduate Program, University of Massachusetts-Amherst, United States

---

10 **Abstract** Gastropod molluscs such as *Aplysia*, *Lymnaea*, and *Tritonia* have been important for  
11 determining fundamental rules of motor control, learning, and memory because of their large,  
12 individually identifiable neurons. Yet for the vast majority of gastropod neurons, as well as glia,  
13 there are no established molecular markers, limiting the ability to establish brain-wide  
14 structure-function relations. Here we combine high-throughput, single-cell RNA sequencing  
15 (scRNAseq) with *in-situ* hybridization chain reaction (HCR) in the nudibranch *Berghia stephanieae*  
16 to identify and visualize the expression of markers for cell types. Broad neuronal classes were  
17 characterized by genes associated with neurotransmitters, like acetylcholine, glutamate,  
18 serotonin, and GABA, as well as neuropeptides. These classes were subdivided by other genes  
19 including transcriptional regulators and unannotated genes. Marker genes expressed by neurons  
20 and glia formed discrete, previously unrecognized regions within and between ganglia. This study  
21 provides the foundation for understanding the fundamental cellular organization of gastropod  
22 nervous systems.

---

## 24 Introduction

25 The central nervous system (CNS), including the brain, contains many different cell types, forming  
26 the basis of its complex structure and connectivity, and enabling its sophisticated functions. Cell  
27 type diversity in the CNS is reflected in differential gene expression across neurons (*Lein et al.,*  
28 *2007; Vergara et al., 2017*). Analysis of high-throughput single cell RNA sequencing (scRNAseq) al-  
29 lows brain-wide classification of neurons based on gene expression (*Brunet Avalos et al., 2019;*  
30 *Gavriouchkina et al., 2022; Tasic, 2018; Tosches et al., 2018; Styfals et al., 2022*). The central ring  
31 ganglia (CRG) of gastropod molluscs, such as *Aplysia*, *Lymnaea*, and *Tritonia*, contain large neurons,  
32 some of which can be individually identified based on immunohistochemistry (IHC), neuroanatomy,  
33 and neurophysiology (*Katz and Quinlan, 2019; Leonard, 2000*). These same characteristics can  
34 even be used to identify homologous neurons across species (*Croll, 1987; Newcomb et al., 2012*).  
35 However, these approaches are generally limited to the small number of large neurons that are  
36 impaleable with intracellular microelectrodes and by the availability of antibodies; they do not  
37 easily scale up to the thousands of small neurons in the CRG or the even smaller neurons in pe-  
38 ripheral ganglia. We combined scRNAseq with *in-situ* hybridization chain reaction (HCR) to obtain  
39 a more complete atlas of neurons in head ganglia of the nudibranch, *Berghia stephanieae* (Fig. 1).

40 Neuron type profiles that incorporate combinations of marker genes as well as soma size and po-  
41 sition should enable the identification of neuronal sub-classes and even individual cell types in  
42 gastropods, as seen in well-studied laboratory species like *Caenorhabditis elegans* and *Drosophila*  
43 *melanogaster*.

44 *Berghia* offers many advantages over other commonly used gastropods for high throughput  
45 neuroscience research. It has a 2-month generation time, is commercially available, and can be  
46 reared and raised in the lab with minimal effort. Like other nudibranchs, the CRG, consisting of  
47 the fused cerebral (*ceg*) and pleural (*plg*) ganglia, pedal ganglion (*pdg*), and buccal ganglion (*bcg*),  
48 are condensed in the head (Fig. 1B, C). Homologs of neurons from other gastropods have already  
49 been found in *Berghia* (Watkins, 2022; Whitesel, 2021).

50 Some key advantages of gastropod brains also present challenges for high-throughput scR-  
51 NASEq methods. First, there is a ten-fold variation in soma size, with the smallest neurons being  
52 less than 10 $\mu$ m in diameter and the largest over 100 $\mu$ m. Larger neurons are more fragile and  
53 less likely to survive cell dissociation, or may be too large to fit into the microfluidics devices of  
54 some scRNAseq methods. The CRG have fewer than 10,000 neurons overall, limiting the number  
55 of neurons that can be obtained from each sample. Finally, many neurons are present as a sin-  
56 gle bilateral pair per animal. Thus, obtaining the numbers of neurons typically used in scRNAseq  
57 studies is logistically challenging.

58 Besides the CRG, ganglia are associated with peripheral organs in gastropods, such as the gen-  
59 itals, tentacles, and rhinophores. In most nudibranchs, the rhinophore ganglion (*rhg*) is located  
60 distally within each rhinophore, a paired dorsal head appendage used for distance chemorecep-  
61 tion (Arey, 1918; Cummins and Wyeth, 2014; Storch and Welsch, 1969; Wertz et al., 2006). However,  
62 in *Berghia* the *rhg* sits at the base of the rhinophore and is separated from the CRG by a short nerve  
63 connective (Fig. 1B). Unlike the large neurons found in the CRG, no individual neurons or clusters  
64 have been identified in the *rhg*, due primarily to the small size of the neurons and their relative in-  
65 accessibility. Combining scRNAseq and HCR offers a new opportunity to catalog these peripheral  
66 neurons.

67 The results presented here describe neuronal gene expression in the CRG and *rhg*, showing that  
68 multiple neuronal classes, and non-neuronal cell types, can be recognized by differential gene ex-  
69 pression. Other specific neuron types can be identified using the combination of gene expression  
70 with soma size and position. We found that unknown, unannotated genes represented a surpris-  
71 ingly sizable proportion of cluster-specific markers, highlighting importance of using unannotated  
72 genes for cell type identification, especially in understudied phyla like molluscs. We also present  
73 results showing unexpected diversity and organization of the neurons in the *rhg*, which suggest  
74 a high degree of complexity in this peripheral ganglion. Finally, we found differences in neuronal  
75 gene expression that distinguish the ganglia themselves and zones within ganglia. This study high-  
76 lights the use of modern, high-throughput molecular methods to develop a gene-based atlas of  
77 neurons in a non-traditional study species.

## 78 Results

### 79 We created a brain-enriched reference transcriptome for *Berghia*

80 Orthofinder2 (Emms and Kelly, 2018) was used to group similar sequences from transcriptomes,  
81 obtained from *Berghia* and other nudibranchs, as well as predicted peptides from the genomes of  
82 other gastropods like *Aplysia* and *Lottia*, into phylogenetically determined Hierarchical Orthogroups  
83 (HOGs). The output of the EnTAP (Hart et al., 2020) and Trinotate (Bryant et al., 2017) annota-  
84 tion pipelines on the *Berghia* transcriptome, as well as annotations from sequences from other  
85 gastropods were combined to annotate each HOG. The final reference transcriptome contained  
86 78,000 transcripts representing 48,351 HOGs. Of the total number of HOGs, 22,844 contained se-  
87 quences from both *Berghia* and at least one other gastropod, and the remaining 25,507 were found  
88 only in *Berghia*. Because of the gene-species tree reconciliation performed by Orthofinder2, some

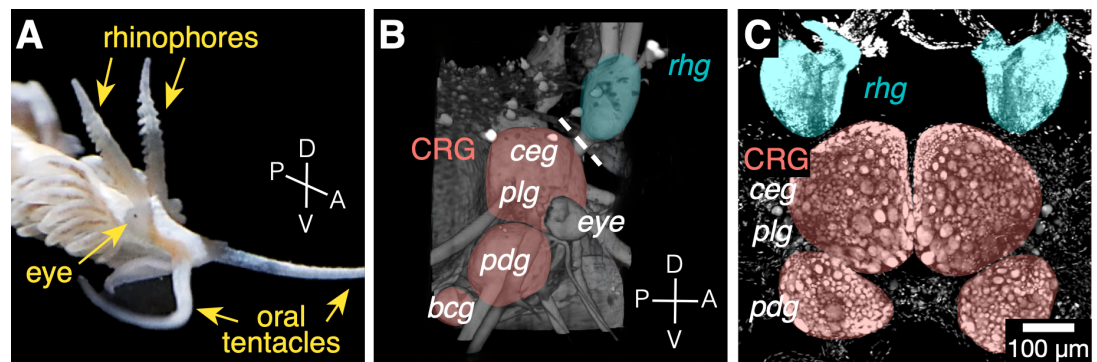

**Figure 1.** The *Berghia* brain atlas consists of cells taken from the central ring ganglia (CRG) and rhinophore ganglia (*rhg*). A) An adult *Berghia*, showing the head and positions of the rhinophores, eyes, and oral tentacles. B) 3D rendered and pseudocolored image of autofluorescence of the brain in an intact animal embedded in hydrogel. MHD-assisted CLARITY (Dwyer et al., 2021) was used to clear the tissue, then imaged using lightsheet microscopy. The right *rhg* (cyan) and CRG (pink) are shown. The dashed line crosses the *rhg* - *ceg* connective. C) Z-projection of a fluorescence confocal image of dissected head ganglia with DAPI-labeled nuclei. The CRG and *rhg* ganglia are labeled and colored corresponding to the 3D rendering in B. The *bcg* are not shown. Abbreviations: *ceg* - cerebral ganglion, *plg* - pleural ganglion, *pdg* - pedal ganglion, *bcg* - buccal ganglion.

89 *Berghia* sequences were separated from their true orthologs into their own HOG, artificially inflat-  
90 ing the number of *Berghia*-only HOGs. At least one annotation was appended onto 29,991 HOGs,  
91 and the remaining 18,360 HOGs were unannotated.

## 92 Single cell transcriptomes

93 After gene counts for single cells were acquired using kallisto (Bray et al., 2016) and bustools (Mel-  
94 sted et al., 2021), data were analyzed using the R package Seurat (Hao et al., 2021). Following  
95 standard quality control filtering, we recovered transcriptomes for 872 cells from the CRG and 708  
96 cells from the *rhg*. These 1,580 cells segregated into 19 clusters based on similarity of gene ex-  
97 pression. Multiple clusters within the 19 were artifacts of overclustering our dataset, and so those  
98 not distinct in terms of differentially expressed genes (DEGs) were collapsed together, guided by a  
99 visualization of cluster stability across resolutions from Clustree (Zappia and Oshlack, 2018). This  
100 split-merge method allowed small clusters with strong signals, like the serotonergic neurons, to  
101 be separated out, instead of being subsumed into a larger cluster. A total of 14 clusters were  
102 established for the final dataset (Fig. 2).

103 Cell clusters were annotated using DEGs to assign putative identities based on the literature,  
104 and the sample origin. Nine neuronal and five non-neuronal cell clusters were found (Fig. 2B,  
105 Fig. 3), most of which had cells from both the *rhg* and CRG samples (Fig. 2A). Cluster markers  
106 were selected based on DEG between each cluster versus all others (Fig. 3). In most neuronal  
107 clusters, the best specific markers were often expressed in fewer than 50% of cells, indicative of  
108 heterogeneity within the clusters. This contrasted with the cluster markers for non-neuronal cell  
109 types, where the percentage of cells in the cluster expressing a marker was often much higher  
110 (over 90%). The remainder of our analysis focused on neuronal and glial clusters only.

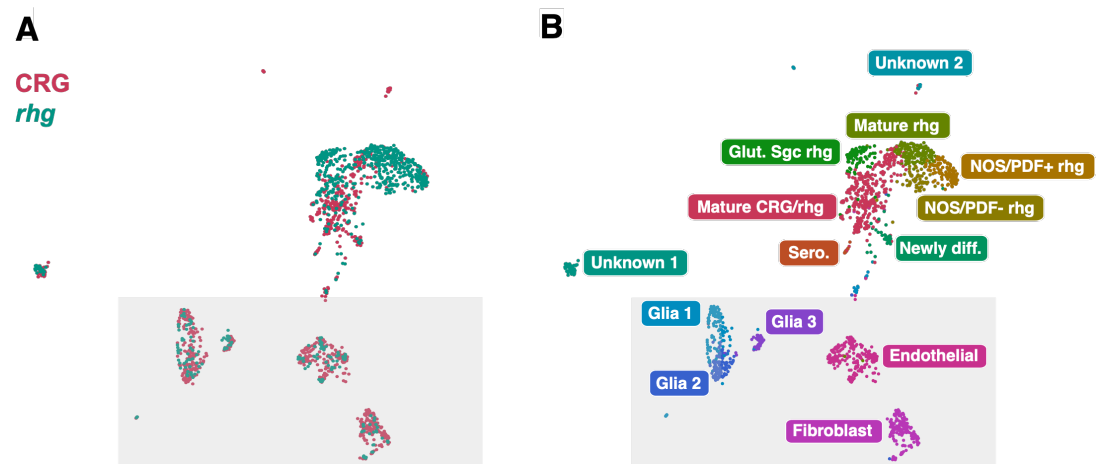

**Figure 2.** The *Berghia* single cell atlas contains 14 cell clusters, with 9 neuronal clusters and 5 non-neuronal clusters. A) Unifold Manifest Approximation and Projection (UMAP) plot of the *Berghia* single cell RNA-seq dataset from the two samples, the CRG (pink) and *rhg* (cyan). Most clusters are a mix from both samples. B) UMAP plot showing 1580 *Berghia* cells organized into 14 clusters. Non-neuronal clusters are contained within the shaded box.



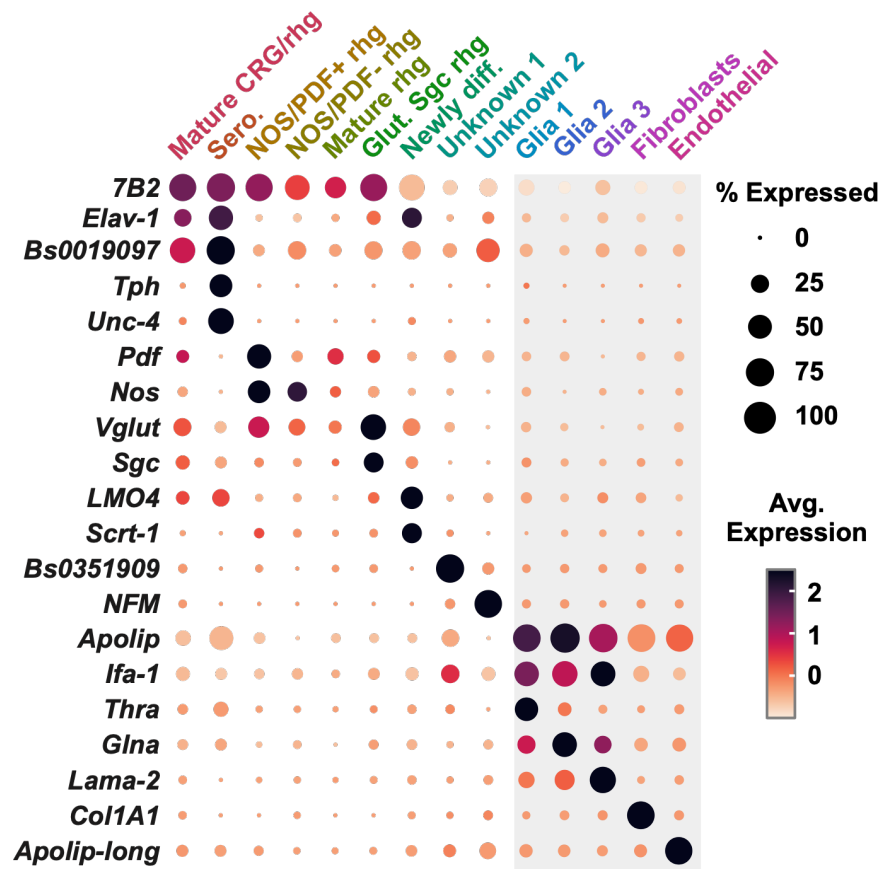

**Figure 3.** Dotplot of selected marker genes for each cluster. Non-neuronal cell types are boxed in gray. Cluster names and colors correspond to those in Fig. 2B.

### 111 Pan-neuronal and pan-glial marker genes distinguish neurons and glia in the brain 112 of *Berghia*

113 The expression of pan-neuronal genes marked neuronal clusters. 865 putative neurons were identified, spread across seven clusters (Fig. 3). Canonical neuronal markers like *Elav-1* (Fig. 3, Fig. 4A) were expressed primarily in four clusters. Oddly, *Elav-1* was not well represented in clusters primarily containing *rhg* neurons, where expression was mostly absent or sparse (Fig. 4A). Despite the low number of neurons with mRNA for *Elav-1* in the scRNAseq, HCR for *Elav-1* appeared to label all neurons, including neurons in the *rhg* (Fig. 4E), as expected from *Elav-1* expression in neurons in other animals.

120 Another pan-neuronal marker was neuroendocrine protein *7B2*. This gene is expressed in most neurons in other animals, including molluscs (*Hwang et al., 2000; Marcinkiewicz et al., 1994; Spjaker et al., 1999*). *7B2* mRNA was abundant and found in all putative neuronal clusters regardless of sample origin (see Figs. 3, 4B & 4F). Low and sparse mRNA expression for *7B2* was also found in a cluster of putative non-neuronal glial and endothelial cells, consistent with previous findings in mouse (*Seidel et al., 1998*). *7B2* is the molecular chaperone for *prohormone/neuroendocrine convertase 2 (pc2)*, and *pc2* mRNA was also highly abundant in neuronal clusters. The expression of *7B2* and its molecular partner support the identification of cells in these clusters as neurons.

128 Finally, we found mRNA for an unannotated gene, *Bs19097*, present primarily in neuronal clusters and expressed ubiquitously in neurons across all ganglia (Fig. 3 & 4C). Multiplexed HCR showed extensive co-expression of *Elav-1* (Fig. 4E), *Bs19097* (Fig. 4G, I), and *7B2* (Fig. 4F), in addition to overlapping expression in presumptive neuronal clusters in the scRNAseq dataset (Fig. 4A-C). Because expression patterns for *Bs19097* closely match known pan-neuronal markers, we are confident in

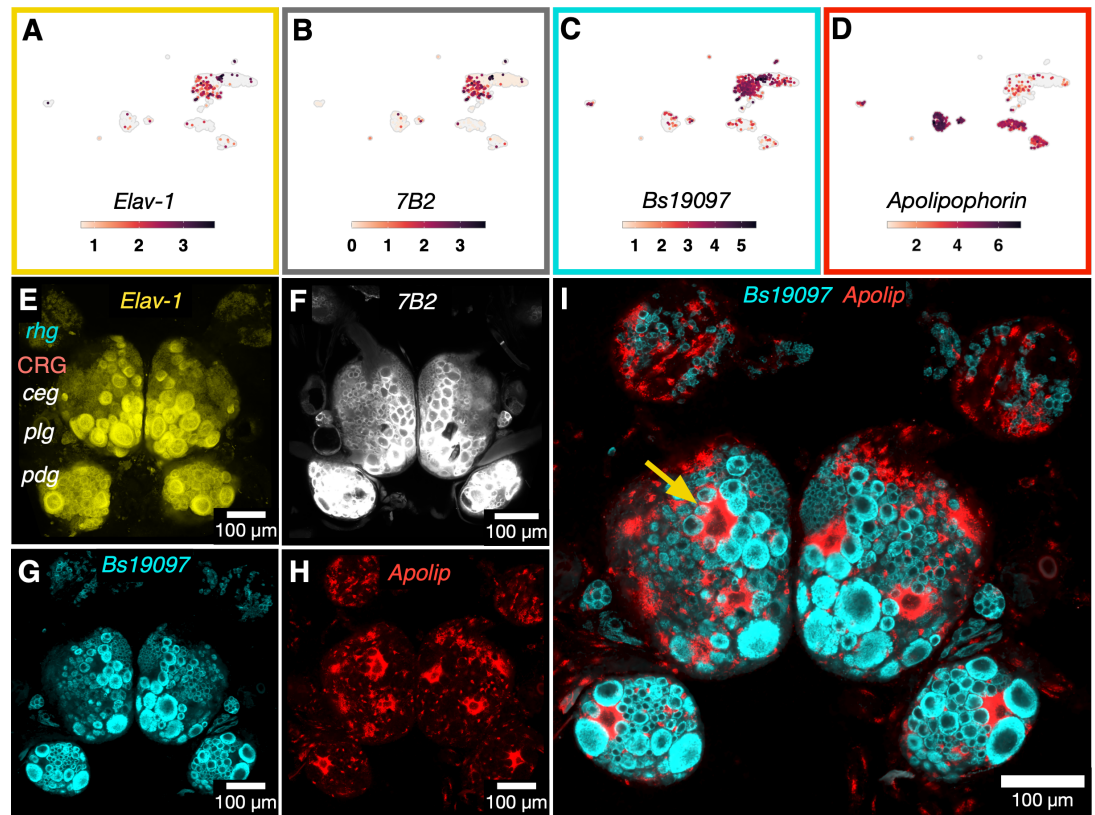

**Figure 4.** Pan-neuronal and pan-glial genes mark their respective cell types. A-D) UMAP plots showing mRNA abundances and distributions for *Elav-1* (A), *7B2* (B), *Bs19097* (C), and *Apolipophorin* (D). E-H) Single optical sections of a fluorescence confocal z-stack using HCR to label mRNA for pan-neuronal and pan-glial markers: *Elav-1* (E), *7B2* (F), unannotated transcript *Bs19097* (G), and the pan-glial marker *Apolipophorin* (H). Panels G & H are from the same multiplexed HCR sample. The yellow arrow indicates one of the individually identifiable giant glial cells. I) Expression of both *Bs19097* (cyan) and *Apolipophorin* (red) in the same sample.

133 its identity as a pan-neuronal marker, despite its anonymity as a gene.

134 Three clusters containing putative glial cells shared many DEGs in common. Markers such as  
 135 *glutamine synthetase* support the identity of cells in these clusters as glia (Linser et al., 1997) (Fig. 3).  
 136 We did not find expression of canonical glial markers such as *Gfap* in vertebrates (Eng, 1985; Eng  
 137 et al., 2000) or *Repo* in arthropods (Halter et al., 1995; Xiong et al., 1994) in the *Berghia* reference  
 138 transcriptome, and therefore they were also absent from the scRNAseq data. This is consistent  
 139 with recent scRNAseq in the brains of cephalopod molluscs (Gavriouchkina et al., 2022; Songco-  
 140 Casey et al., 2022; Styfhals et al., 2022). A transcript annotated as an *intermediate filament protein 1*  
 141 (*Ilf1*), the same superfamily as *Gfap* (Peter and Stick, 2015), was differentially expressed in the pu-  
 142 tative glial clusters (Fig. 3). *Apolipoprotein* (annotated as *Apolipophorin*) was used as a glial marker  
 143 in *Octopus* (Styfhals et al., 2022). *Apolipophorin* in *Berghia* was differentially expressed in glial clus-  
 144 ters, although mRNA for this transcript also appeared in cells from both endothelial and fibroblast  
 145 clusters (Fig. 4D).

146 *Apoliophorin* HCR revealed a large number of small cells located in the sheath and neuropil  
 147 that are consistent with glial positions and morphologies (Fig. 4H,I). Many small glial cells also  
 148 appeared in between neuronal cell bodies. Additionally each ganglion contained multiple giant  
 149 glia. These glia had giant nuclei, similar in size to some of the largest neuronal nuclei, and appeared  
 150 to encase numerous small neuron somata (Fig. 4I, arrow). Giant glia were consistently found in  
 151 bilaterally symmetrical pairs and were individually identifiable across animals. No cells were found  
 152 expressing both neuronal and glial markers, supporting the specificity of markers for these broad

153 cell types.

154 **The expression patterns of candidate genes and cluster markers subdivide neu-**  
155 **ronal classes**

156 Candidate genes that subdivide neurons into large classes or groups were examined. These in-  
157 cluded markers for differentiating neurons, neurotransmitters, neuropeptides, and genes involved  
158 in transcriptional regulation. Most often, these markers spanned multiple neuronal clusters and  
159 by themselves did not distinguish clusters. Primary exceptions for this pattern were markers for  
160 newly differentiated neurons, which together cleanly delineated this cluster in the atlas. Seroton-  
161 ergic neurons also had highly specific cluster markers in the atlas. Overall, regardless of the specificity  
162 of a gene to a cluster in the single cell atlas, visualizing the expression in the brain revealed neu-  
163 ronol classes, with a wide diversity of neurons of different sizes, numbers, and locations within and  
164 between ganglia.

165 **A suite of transcription factors was expressed in newly differentiated neurons**

166 Genes like *Lmo4*, *Sox6*, *Sox2*, *Scratch-1* are associated with neuronal differentiation. Only cells in  
167 only one cluster in the scRNAseq atlas expressed this suite of genes, suggesting that they were  
168 newly differentiated neurons (Fig. 5). *Lmo4* is a cofactor with *Neurogenin* for neural differentiation  
169 (*Asprer et al., 2011*). *Sox6* and *Sox2* work together to inhibit neural differentiation in vertebrates  
170 (*Lee et al., 2014; Li et al., 2022*). *SoxB1* (homolog of vertebrate *Sox* family genes) is key to neuroblast  
171 formation in *Drosophila* (*Buescher et al., 2002*). *Scratch-1* is important for neural differentiation  
172 in *C. elegans*, mammalian cell culture, and *Drosophila* (*Manzanares et al., 2001; Nakakura et al.,*  
173 *2001; Nieto, 2002*). In mammalian forebrain, *Scratch* genes act downstream of proneural genes  
174 like *Neurogenin* and *Ascl1* and control the initiation of migration of newly differentiated neurons  
175 (*Itoh et al., 2013*).

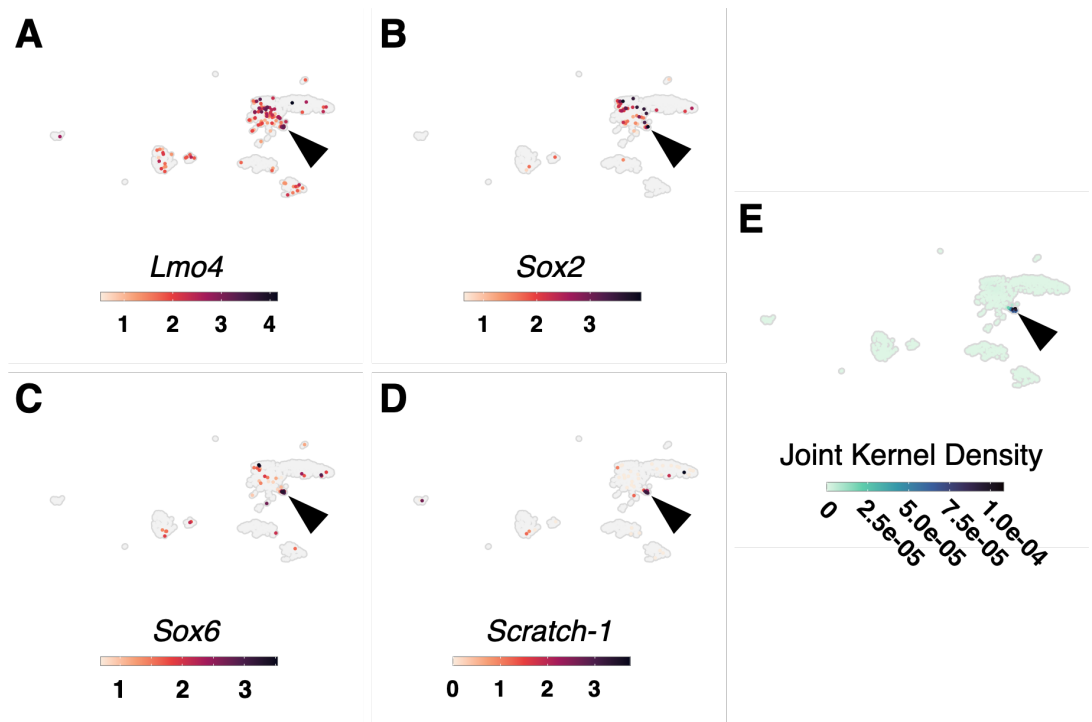

**Figure 5.** Marker genes expressed in a cluster containing newly differentiated neurons. A-D) *Lmo4* (A), *Sox2* (B), *Sox6* (C), and *Scratch-1* (D). E) Joint kernel density plot showing the peak of overlapping expression of the four genes specifically in the newly differentiated neuron cluster (arrowheads).

176 **Major small molecule neurotransmitters: glutamate, GABA, acetylcholine and sero-**  
177 **tonin**

178 We looked for the expression of candidate enzymes and transporters associated with small molecule  
179 neurotransmitters. In the single cell atlas, mRNAs were found for *Vesicular glutamate transporter*  
180 (*Vglut*, glutamate), *Choline acetyltransferase* (*Chat*, acetylcholine), *Glutamate decarboxylase* (*Gad*, GABA),  
181 *Tryptophan hydroxylase* (*Tph*, serotonin), *Histidine decarboxylase* (histamine), and *Tyramine beta-*  
182 *hydroxylase* (octopamine). There was no evidence of mRNA for *Tyrosine hydroxylase*, the rate-limiting  
183 enzyme for catecholamine synthesis, but this may be the result of low gene expression, the small  
184 number of neurons captured, and the rarity of catecholaminergic neurons in the CRG of gastropods  
185 (*Croll, 2001*) rather than true absence. A total of 484 neurons (about 50%) possessed mRNAs for  
186 at least one of these genes (Fig. 6A-D).

187 Using HCR, we visualized mRNAs for the most prevalent neurotransmitter-associated genes:  
188 *Vglut*, *Gad*, *Chat*, and *Tph* (see Fig. 6E-P). A large percentage of the neurons in the head ganglia  
189 expressed the genes associated with these neurotransmitters. There was co-expression of at least  
190 two neurotransmitters in a small number of neurons for *Vglut*, *Gad*, *Chat*, and *Tph* (Fig. 6M-P, ar-  
191 rowheads).

192 Glutamate appeared to be the most prevalent neurotransmitter in the head ganglia based on  
193 number of cells containing mRNA for *Vglut*. *Vglut* loads glutamate into vesicles to be released at  
194 synapses. One *Vglut* transcript was expressed in 327 neurons from both the CRG and *rhg* scRNAseq  
195 samples (Fig. 6A). The spatial distribution of *Vglut* mRNA in the brain supports the single cell data-  
196 *Vglut* HCR labeled many neurons and at relatively high levels as a transporter (Fig 6E). *Vglut* HCR  
197 also labeled photoreceptors in the eye (Fig. 6M-P, arrow).

198 Based on the expression of its rate-limiting synthesis enzyme, *Gad*, GABA (*γ-aminobutyric acid*)  
199 appears to not be a prominent neurotransmitter in the brain of *Berghia*; only a handful of neurons  
200 containing *Gad* mRNA were found in the single cell dataset (Fig. 6B). *Gad* HCR labeled only a small  
201 number of neurons across the CRG (Fig. 6F), which is similar to what was seen for GABA IHC (*Gu-*  
202 *naratne et al., 2014; Gunaratne and Katz, 2016*). However, the mRNA expression levels in many  
203 of these neurons were higher than that of *Vglut* and *Chat* based on the density and intensity of the HCR  
204 signal in *Gad* neurons. There were no clearly distinguishable *rhg* neurons that expressed *Gad*.

205 Acetylcholine, like glutamate, appeared widespread in neurons throughout the head ganglia.  
206 *Chat*, the rate-limiting enzyme for acetylcholine synthesis, was expressed in multiple clusters of  
207 mature neurons from the CRG and *rhg* scRNAseq dataset (Fig. 6C). 108 neurons contained *Chat*  
208 mRNA in the scRNAseq dataset. *Chat* HCR showed mRNA present in many neurons (Fig. 6G), but  
209 fewer than those that expressed *Vglut* (Fig. 6E), which is consistent with the percentage found in  
210 the brain of the slug *Limax* (*D'Este et al., 2011*).

211 Serotonin was not as widespread as glutamate or acetylcholine but was more prevalent than  
212 GABA. mRNA for *Tph*, the rate limiting enzyme for serotonin synthesis, was found exclusively in  
213 a cluster containing only 8 neurons in the single cell atlas (Fig. 6D, yellow arrow). However, *Tph*  
214 HCR showed mRNA in the brain was more prevalent than suggested from the single cell data (Fig.  
215 6H). Unlike *Vglut* and *Chat*, HCR for *Tph* was much more spatially restricted. The majority of *Tph*-  
216 expressing cells were found in the pedal ganglia, and a much smaller number (< 20) were found in  
217 the cerebral-pleural ganglia (Fig. 6H). The distribution of *Tph* neurons in the *Berghia* brain matches  
218 the highly conserved pattern of serotonin IHC seen in other nudibranch species (*Newcomb et al.,*  
219 *2006*).

220 Co-expression of multiple genes associated with different neurotransmitters (*Hnasko and Ed-*  
221 *wards, 2012*) was found in both the scRNA-seq dataset and with HCR. The small molecule neuro-  
222 transmitters were mostly non-overlapping in expression (Fig. 6I-P). However, at least one neuron in  
223 the *plg* colabeled for *Vglut* and *Chat* (Fig 6 M, P open arrowhead) and another in the *pdg* expresses  
224 both *Tph* and *Chat* (Fig. 6 O,P, solid arrowhead).



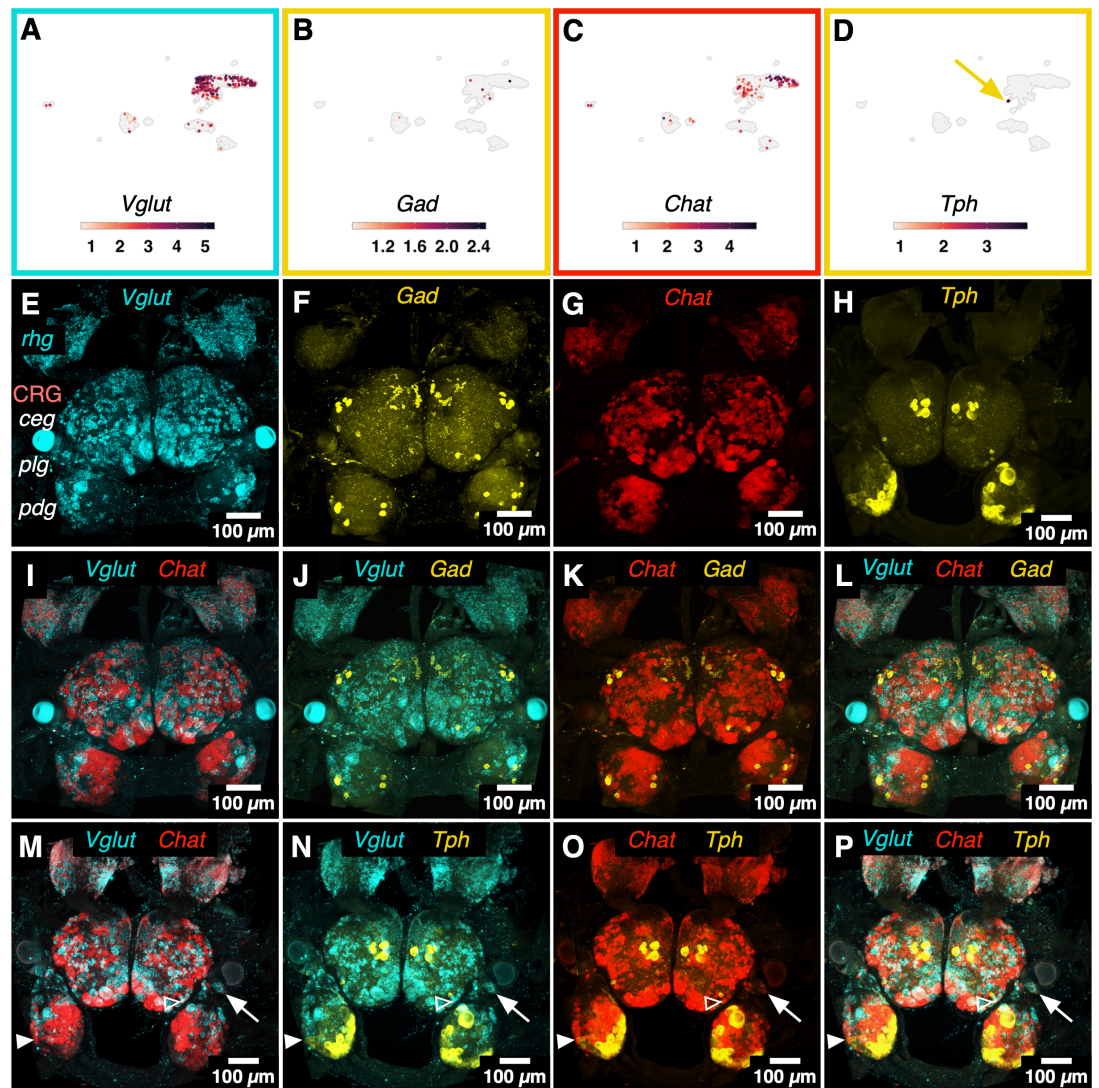

**Figure 6.** Abundance and visualization of mRNA for neurotransmitter-associated enzymes and transporters in *Berghia*. A-D) UMAP plots showing mRNA abundances of *Vglut* (A), *Gad* (B), *Chat* (C), and *Tph* (D) across neuronal clusters. The yellow arrow in (D) points to the small cluster of *Tph*<sup>+</sup> neurons. E-H) Z-projections of fluorescence confocal images using HCR to label *Vglut* (E), *Gad* (F), *Chat* (G), and *Tph* (H). (E-G) are channels from the same multiplexed sample; (I-L) show *Vglut*, *Gad*, and *Chat* pairwise and triple-labeled from that same sample. (M-P) show *Vglut*, *Chat* and *Tph* pairwise and triple-labeled in the sample shown in (H). The white arrows point to a *Vglut*<sup>+</sup> photoreceptor in the eye. The open white arrowheads point to a neuron double-labeled for *Vglut* and *Chat*. The solid white arrowheads point to a neuron double-labeled for *Chat* and *Tph*. Most of the neurons are labeled for only one of the genes.

**Figure 6-Figure supplement 1.** Co-expression of neurotransmitter-related genes in single cells

225 **Conserved transcriptional regulators and signaling pathway genes define brain re-**  
226 **gions and neuronal classes**

227 *Six3/6* is involved in many different developmental processes in animals, including anterior brain  
228 and eye development (*Bernier et al., 2000; Seimiya and Gehring, 2000*). While *Six3/6* mRNA was  
229 found in neurons in multiple clusters in the atlas, it was highly differentially expressed in the gluta-  
230 matergic *Solute guanylate cyclase (Sgc) rhg* neuronal cluster (Fig. 7A). Using HCR to visualize *Six3/6*  
231 mRNA, expression was distributed among many *rhg* neurons while in the CRG it was essentially  
232 restricted to *ceg* neurons (Fig. 7C). These are the most anterior ganglia of the major head ganglia  
233 (see Fig. 1B). Anterior expression is consistent with *Six6* expression in developing vertebrate brains  
234 (*Oliver et al., 1995*). *Six3/6* also has a role in eye development in multiple animal phyla (*Seimiya*  
235 *and Gehring, 2000; Seo et al., 1998*), but using HCR, there was no expression of *Six3/6* in the eye.  
236 However, a single neuron within the optic ganglia was labeled for *Six3/6*. *Optix* (the *Six3/6* homolog  
237 in *Drosophila*) regulates and demarcates the larval optic lobe (*Gold and Brand, 2014*).

238 A transcript annotated as *Delta-like* was another broadly expressed gene in the single cell data.  
239 Both *Delta* and *Jagged* are similar transmembrane protein ligands for Notch receptors to initiate a  
240 signaling cascade typically associated with early development of major aspects of nervous systems  
241 across animals (*Bettenhausen et al., 1995; Chitnis et al., 1995; Henrique et al., 1995; Kawaguchi*  
242 *et al., 2008*). In *Berghia*, there was a higher density of *Delta*-expressing neurons in the *rhg*, and *Delta*  
243 was a DEG in *rhg* neurons (Fig. 7B). *Six3/6* and *Delta* were DEGs in the glutamatergic *Sgc rhg* neuron  
244 cluster in the scRNAseq atlas (Fig. 7B,D). Many neurons in the *rhg* expressed both *Six3/6* and *Delta*  
245 (Fig. 7E). *Delta* mRNA was present in the scRNAseq cluster of newly differentiated neurons, consis-  
246 tent with its role in development. However, *Delta* mRNA was also found in neurons across all head  
247 ganglia in presumably mature neurons from adult CRG (Fig. 7D). Many of the *Delta* expressing neu-  
248 rons differ in size and location, suggesting that *Delta* may be part of the gene expression profiles  
249 of multiple neuron types in the *Berghia* CNS (Fig. 7D).



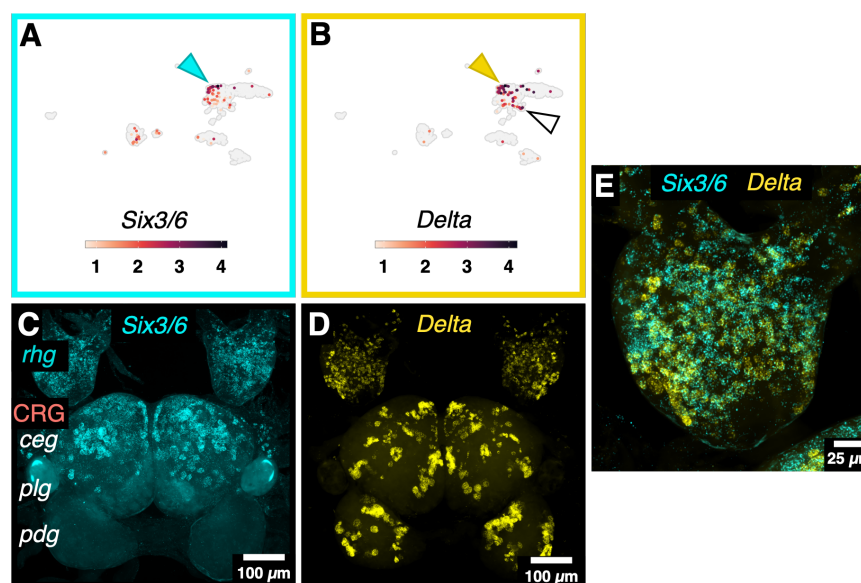

**Figure 7.** Expression of transcriptional regulators and signaling pathway genes help define different brain regions. A) *Six3/6* mRNA was most abundant in *Soluble guanylate cyclase* (*Sgc rhg*) neurons in the single cell atlas and was differentially expressed in this cluster (cyan arrowhead). B) *Delta* mRNA was concentrated in the *Sgc rhg* (yellow arrowhead) and differentiating neuron (white arrowhead) clusters in the single cell atlas. *Delta* was differentially expressed in the *Sgc rhg* neuron cluster. C) Z-projection of a fluorescence confocal image using HCR to label *Six3/6* mRNA. It was almost exclusively present in neurons in the anterior-most ganglia, the *rhg* and the cerebral ganglion *ceg*. D) Z-projection of a fluorescence confocal image of the left *rhg* using HCR to label *Delta* mRNA showed it was widely distributed across the ganglion. Many neurons in the *rhg* contained *Delta* mRNA, some of which likely correspond with the *Sgc rhg* neurons. E) Higher magnification of the *rhg* showing co-expression of *Six3/6* and *Delta* in many of the same neurons. C, D, and E are the same sample.

## 250 The neuropeptide complement in *Berghia* includes both broadly conserved bilate- 251 rian genes and others that are lineage-specific

252 At least 40 neuropeptides were found in the scRNAseq data, representing approximately 30 fam-  
253 ilies out of a minimum set of 65 molluscan neuropeptides (*De Oliveira et al., 2019*) (Fig. 8). The  
254 large Mature CRG/*rhg* neuron cluster showed high average expression of most neuropeptides in a  
255 small number of neurons, suggesting this cluster consists of many rare neuron types. *APGWamide*  
256 (*Apgw* or *Cerebral peptide*) was one of the most highly expressed genes overall. Visualization of *Apgw*  
257 mRNA in the CRG and *rhg* reflected both the wide range of cells expressing this neuropeptide and  
258 the extremely high levels of expression (Fig. 9A); *Apgw* mRNA was present in both the somata and  
259 axons of many neurons. *CCWamide* was differentially expressed in the largest neuronal clusters,  
260 and widely expressed across clusters in the scRNAseq dataset (Fig. 8, 9B). *CCWamide* was recently  
261 identified in a broad search for neuropeptides in annelids, molluscs, and other lophotrochozoan  
262 phyla (*Thiel et al., 2021; Williams et al., 2017*). Its expression pattern in molluscan brains was not  
263 previously known. HCR for *CCWamide* in *Berghia* reflected the high abundance and broad expres-  
264 sion of *CCWamide* seen in the single cell atlas (Fig. 9B).

265 Other neuropeptides showed more restricted expression. Except for some neurons in the ma-  
266 ture CRG/*rhg* cluster, *Luqin* is found only in the Unknown 2 cluster of neurons, and *Irp-1* in the  
267 Glial 3 cluster. In the *Nos/Pdf+* *rhg* cluster, *Pigment-dispersing factor* (*Pdf*, also called *Cerebrin*, Fig.  
268 10H) and one transcript of *Feeding circuit-activating peptide* (*Fcap*, Fig. 9D) were DEGs. Yet mRNA for  
269 these peptides were not restricted to the *Nos/Pdf+* *rhg* neuron cluster, was present in other neu-  
270 ronal clusters, and was spatially distributed in many, if not all, ganglia. For example, HCR shows  
271 *Pdf* mRNA is also highly expressed by a few distinct CRG neuron types in the *ceg* (Fig. 10H). Besides  
272 its expression in small *rhg* neurons, *Fcap* is also expressed in some of the largest neurons within  
273 the lateral region of the *rhg*, as well as many of the large neurons of the *ceg* and *plg* (Fig. 9E). One

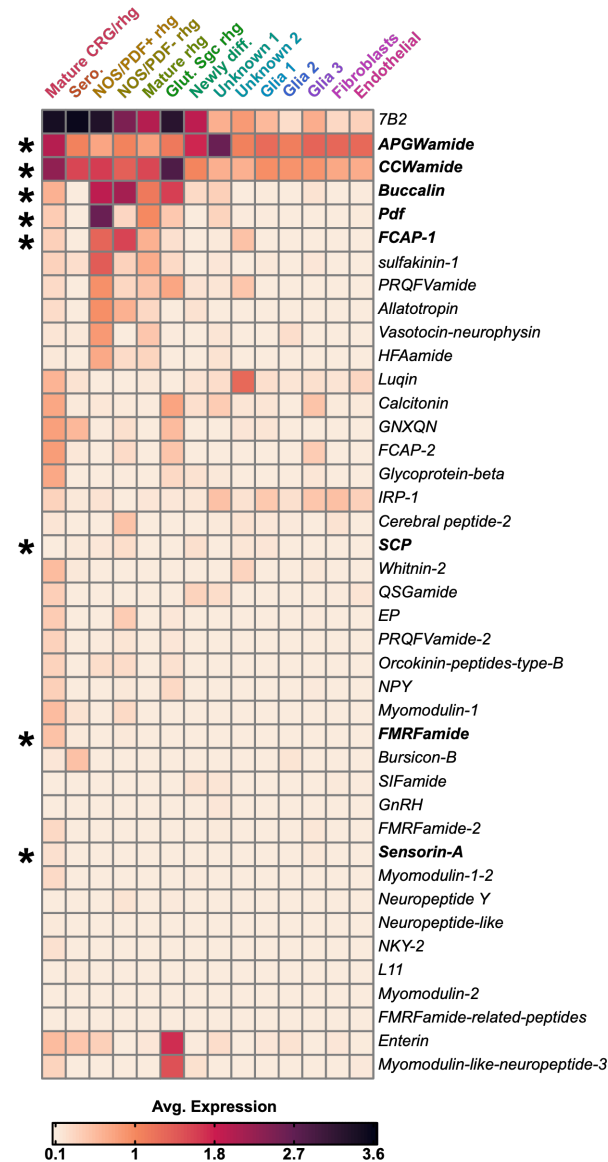

**Figure 8.** Over 40 types of neuropeptides were found within the atlas, and their expression varied by cluster. The mature CRG/*rhg* neuron cluster contained the largest number of neurons, and showed the largest and most varied expression of neuropeptides between the clusters. Only a few neuropeptides were restricted to specific clusters. *Luqin* was primarily expressed in the Unknown 1 cluster of neurons. *Enterin* and *Myomodulin-like-neuropeptide-3* expression marked neurons in the glutamatergic, *Sgc+ rhg* cluster. Asterisks indicate neuropeptides that were selected for visualization using HCR in Figs 9 & 10.

274 large and 4-5 other smaller *bcg* neurons also express *Fcap* (Fig. 9D). *Buccalin*, a putative homolog  
275 for *Allatostatin-A* ([Veenstra, 2010](#)), was also differentially expressed in the *Nos/Pdf+ rhg* cluster (Fig.  
276 9C). Numerous *Buccalin*-expressing cells were found primarily in the *rhg*, *ceg*, and *pdg*, but only a  
277 handful were present in the *plg* (Fig. 9D).

278 In addition to investigating neuropeptides that were differentially expressed in the single cell  
279 atlas, we also looked for expression of neuropeptide candidates gleaned from the literature, in-  
280 cluding *Small cardioactive peptide* (*Scp*) (Fig. 9E) and *FMRFamide* (Fig. 9F). Like the differentially ex-  
281 pressed neuropeptides, these candidate neuropeptides were present in neurons of many different  
282 positions and size classes within the CRG and *rhg*.

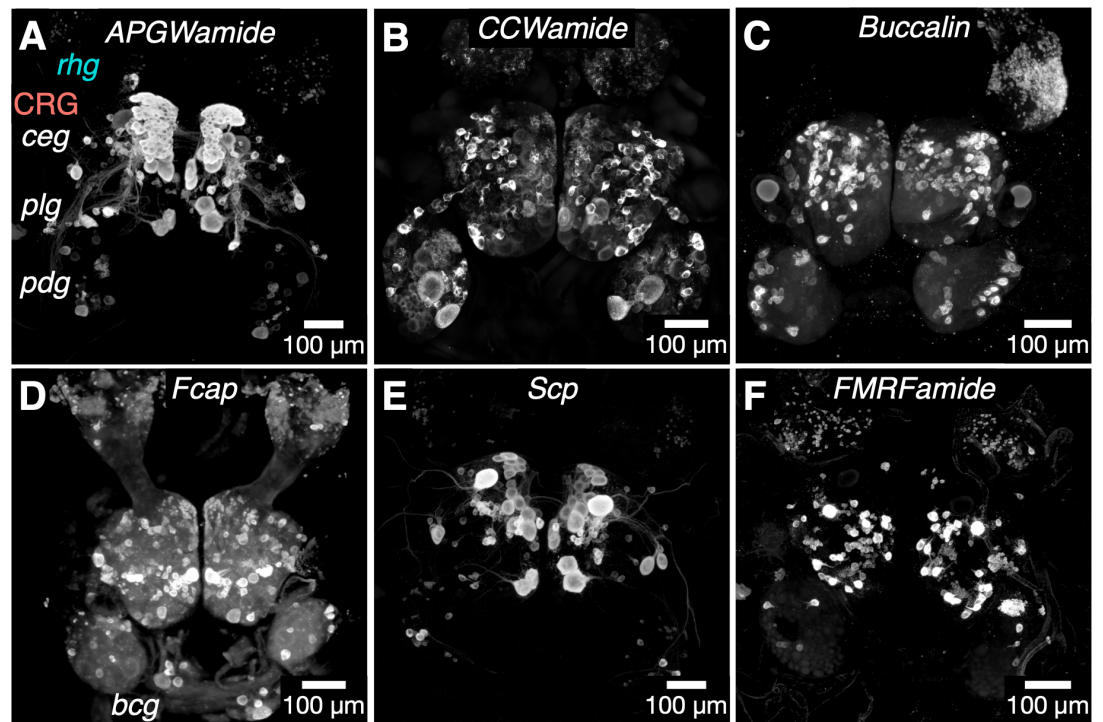

**Figure 9.** Neuropeptide expression was distinct for each gene, and varied greatly in the number of neurons and their distributions across the ganglia. Z-projections of a fluorescence confocal image using HCR to label mRNA for eight neuropeptides: *APGWamide* (A), *CCWamide* (B), *Buccalin* (C), *Fcap* (D), *Scp* (E), and *FMRFamide* (F).

283 **Many *rhg* neurons are distinguished by genes involved in Nitric oxide (NO) signaling**  
284 Two clusters of *rhg* neurons shared expression of *Chat* and *Nitric oxide synthase (Nos)*, but were  
285 distinct in the presence of *Pigment-dispersing factor (Pdf)* mRNA (Fig. 10A,B). HCR for *Nos* and *Pdf*  
286 showed two populations of neurons that likely corresponded to the *Nos/Pdf+* and *Nos/Pdf-* cells in  
287 the single cell dataset (Fig. 10E-G). Both *Pdf* and *Nos* mRNA were also present in a small number  
288 of CRG neurons in the scRNAseq data and labeled using HCR (Fig. 10H).  
289 The other primarily *rhg* neuron cluster in the scRNAseq atlas was marked by the expression  
290 of *Vglut* and *Soluble guanylate cyclase (Sgc)*. *Sgc* is the receptor for nitric oxide (NO) (Martin et al.,  
291 2005), raising the possibility that these neurons may receive NO as signals, potentially from other  
292 *rhg* neurons that express *Nos*. When co-labeled with *Nos* using HCR in the *rhg*, mRNA for the two  
293 genes were mostly mutually exclusive (Fig. 10D,I-K). There appeared to be fewer, larger *rhg* neurons  
294 that express *Sgc*, which were interspersed among *Nos* expressing neurons (Fig. 10K).

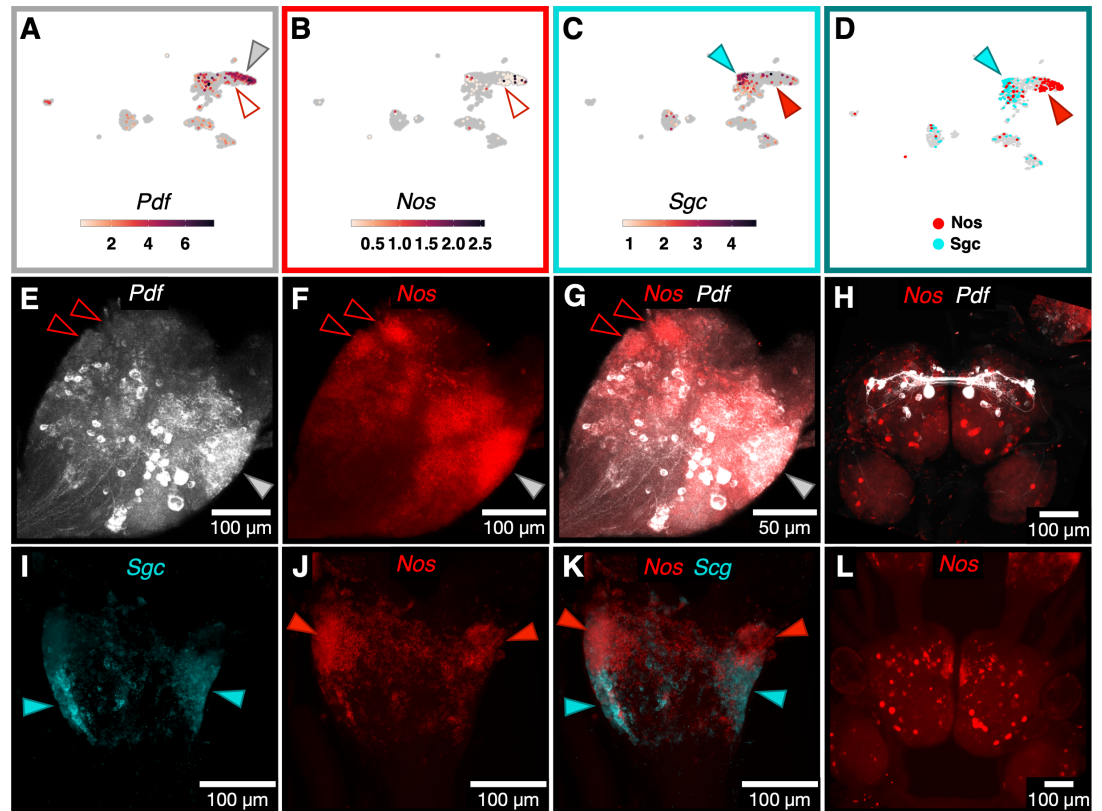

**Figure 10.** Differences in location and co-expression within *Nos*-expressing neuronal populations are matched by spatial segregation. A-D) UMAP plots of mRNA abundances of the neuropeptide *Pdf* (A), *Nos* (B), and *Sgc* (C) in the single cell atlas. D) UMAP plots showing mutually exclusive expression of either *Nos* (red), or *Sgc* (cyan) in some *rhg* neuron populations. E-G) Z-projections of a fluorescence confocal image using HCR to label mRNA for *Pdf* (E), *Nos* (F), and the two channels merged (G) in the *rhg*. Open red arrowheads show *Nos*-expressing cells, and the closed arrowhead shows *Pdf*-expressing cells. H) Z-projection of a fluorescence confocal image using HCR to label mRNA for *Pdf* (white), *Nos* (red) in the CRG. A pair of medium sized *Pdf+* neurons sit near the midline in the *ceg* and send projections contralaterally. The projections appear to meet other *Pdf+* neurons in the *ceg*, which together form a distinct loop throughout the ganglia. I-K) Z-projections of a fluorescence confocal image using HCR to label mRNA in the rhinophore ganglia for *Sgc* (I), *Nos* (J) and the merged image (K). There were distinct populations of cells expressing each gene in the *rhg*. Closed red arrowheads indicate *Nos+* neuron populations, and closed cyan arrowheads indicate *Sgc+* neuron populations. L) Z-projection of fluorescence confocal stack using HCR to label mRNA for *Nos* (red) in the CRG.

295 **Specific neuronal cell classes and types are distinguishable based on their molecu-**  
 296 **lar signatures**

297 Some *Berghia* neurons express the bilaterian molecular signature of mechanosensory neurons.  
 298 Across bilaterians, mechanosensors, as well as interneurons that synapse with mechanosensors,  
 299 share a similar molecular profile. They are glutamatergic, based on their expression of *Vesicular glu-*  
 300 *tamate transporter (Vglut)*, and express the transcription factors *Brain-3 (Brn3)*, *Dorsal root ganglion*  
 301 *homeobox (Drgx)*, *Islet-1 (Isl1)* and *Lim-homeobox 3/4 (Lhx3/4)* (Nomaksteinsky et al., 2013). *Brn3* and  
 302 *Vglut* HCR localized mRNA to neurons in the *plg*, consistent with the known mechano- and nocicep-  
 303 tive circuits in *Aplysia* (Walters et al., 2004). The neuropeptide *Sensorin-A (SenA)* was also expressed  
 304 along with *Brn3*+ mechanosensory neurons in *Lymnaea* (Nomaksteinsky et al., 2013). However,  
 305 most *Brn3*+ neurons in *Berghia*'s scRNAseq dataset were not *SenA*+. A small number of neurons  
 306 within the larger mature CRG/*rhg* atlas cluster were both *SenA*+ and *Brn3*+ (Fig. 11). Consistent  
 307 with co-expression results from the atlas, HCR for these genes showed co-expression in only a  
 308 few neurons (Fig. 11G, dotted box). S-cell homologs (Gettling, 1976) in *Berghia* consisted of about  
 309 15 small *SenA*+ neurons. These cells did not co-express *Brn3*, but there were 1-2 somewhat larger  
 310 *Brn3*+ neurons nestled among them. *Berghia* S-cells were glutamatergic, based on their expression  
 311 of *Vglut*, seen both in the atlas and using HCR. S-cells in other nudibranchs are also glutamatergic  
 312 (Megalou et al., 2009).

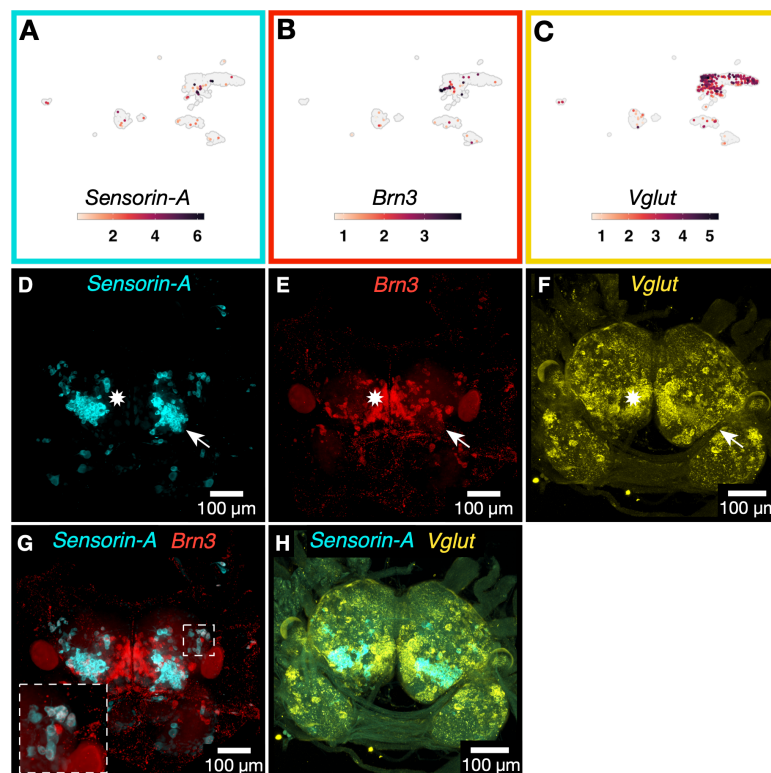

**Figure 11.** Co-expression of *Vglut* in *Brn3*+ cells indicates mechanosensory neuronal identity. A-C) UMAP plots showing expression of *Sensorin-A* (A), *Brn3* (B) and *Vglut* (C) in the single cell dataset. Z-projection of a fluorescence confocal image using multiplexed HCR to label mRNA for D) *Sensorin-A*, and E) *Brn3* in the same sample. F) Z-projection of a fluorescence confocal image HCR to label mRNA for *Vglut*. White arrow indicates the likely homologs of the S-cells (Gettling, 1976) known from other nudibranchs, expressing both *SenA* and *Vglut*, but not *Brn3*. White star indicates cell populations that express *Brn3* and *Vglut*, but not *SenA*. G) A merged z-projection of fluorescence confocal images of multiplexed HCR for *SenA* and *Brn3* in the same sample as (D,E). Dotted box indicates closeup of *SenA*+/*Brn3*+ neurons in the *ceg*. H) A merged z-projection of fluorescence confocal images of multiplexed HCR for *SenA* and *Vglut* in the same sample as (F).



313 **Transcription factor *Unc-4* associates with serotonergic efferent neurons in *Berghia***  
314 *Unc-4* underlies specification of motor neurons in both *C. elegans* and *Drosophila* (Lacin et al., 2020;  
315 Pflugrad et al., 1997). Motor neurons in these species are also cholinergic and express *Chat*, and  
316 *Unc-4* is known in *Drosophila* to repress a GABAergic cell fate leading to a cholinergic one (Lacin  
317 et al., 2020). Surprisingly, in the *Berghia* single cell atlas, *Unc-4* and *Solute carrier family 46 member*  
318 *3* (*Scf46m3*) were differentially expressed along with *Tryptophan hydroxylase* (*Tph*). Here, *Tph* mRNA  
319 was restricted to a small cluster (8 cells), while *Unc-4* and *Scf46m3* mRNAs were found more widely  
320 (Fig. 12). Consistent with the co-expression seen in the single cell data, *Unc-4* and *Scf46m3* were  
321 co-expressed in CRG neurons along with *Tph*, though both genes were also expressed in a small  
322 number of neurons that did not express *Tph* (Fig. 12A-G, cyan and red arrowheads). As the rate-  
323 limiting step in serotonin production, *Tph* was expected to be found only in serotonergic neurons.  
324 Further supporting the specificity of *Unc-4* and *Scf46m3* to serotonergic, rather than cholinergic,  
325 neurons was the lack of overlapping *Chat* and *Tph* mRNA in the atlas. Visualizing mRNAs for *Chat*  
326 and *Tph* with HCR showed overlap in only a handful of neurons (see Fig. 6O,P).

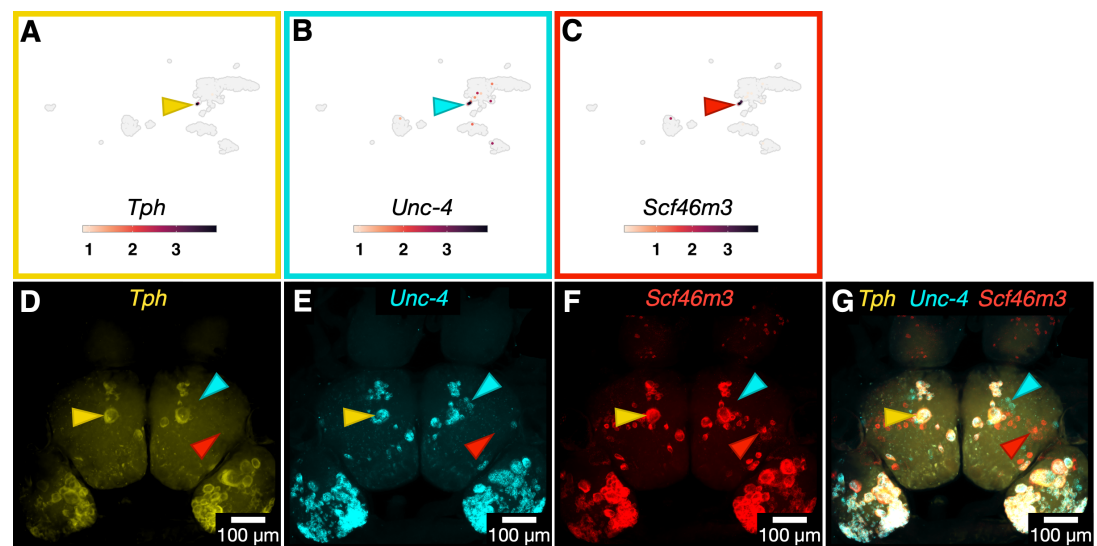

**Figure 12.** HCR labeling shows mRNA for *Tryptophan hydroxylase* (*Tph*), *Unc-4* and *Solute carrier family 46 member 3* (*Scf46m3*) were co-expressed in serotonergic neurons. A-C) UMAP plots showing mRNA abundances for *Tph* (A), *Unc-4* (B), and *Scf46m3* (C). Arrowheads point to the cluster where all three genes are found. D-G) Z-projection of a fluorescence confocal image using HCR to label *Tph* (D), *Unc-4* (E), and *Scf46m3* (F). G) The merged image showing the overlap of these 3 genes. The yellow arrowheads point to the likely homolog of the *Aplysia* metacerebral cell, seen in all three channels. The cyan arrowhead point to an example of neurons expressing only *Unc-4*. The red arrowhead point to an example of neurons expressing only *Scf46m3*.

327 **Detection of molecular signatures for known identifiable neurons**

328 A visually identifiable bilaterally symmetric neuron sits on the ventral surface of the *ceg*, near the  
329 anterior-most region of the ganglion. It is surrounded by a field of much smaller, equally sized  
330 neurons and is the largest of neurons in the ventral *ceg* (Fig. 13A). Due to its unique size and lo-  
331 cation alone, it was straightforward to identify this neuron in images of the ventral surface of the  
332 CRG using only a nuclear label. This neuron was seen in images for pan-neuronal genes, as ex-  
333 pected, but also multiple neuropeptides, including *APGWamide*, *Scp*, and *Fcap* (Fig. 13B-D). Besides  
334 neuropeptides, the neuron was observed in HCR images for the enzyme *Chat* (Fig. 13E).

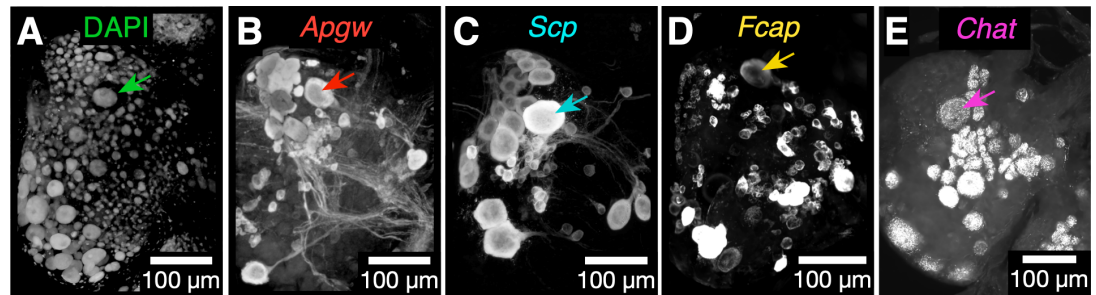

**Figure 13.** Molecular fingerprint for the giant ventral peptidergic neuron was assembled by analyzing different images of gene expression patterns with Z-projection of a fluorescence confocal image using HCR. Each image shows the right *ceg* and *plg*. Arrows indicate the large identifiable neuron in each. A) Nuclei labeled with DAPI. (B-E) HCR labeling for: *APGWamide* (B), *Scp* (C), *Fcap* (D) and *Chat* (E). All panels are from different samples.

335 **Unannotated genes are key to differentiating neuron clusters/groups/types**

336 One striking feature of the top markers for all clusters was the abundance of unannotated genes  
337 that were differentially expressed (Fig. 14). Unannotated HOGs represented 38% of the total num-  
338 ber of HOGs. The high percentage of unannotated HOGs highlights the historical lack of molecu-  
339 lar and functional data to characterize these clade-specific genes found in gastropods and other  
340 molluscs. Of unannotated HOGs, only 13% (2,448) were shared among *Berghia* and at least one  
341 other gastropod, and the remaining 87% (15912) of unannotated HOGs contained only *Berghia*  
342 sequences.

343 Out of a total of 24,762 transcripts that ended up in the single cell dataset, 48% (11891) were  
344 unannotated, and 52% annotated (12871). Within unannotated transcripts, 31% (3680) were shared  
345 between *Berghia* and at least one other species, and 69% (8211) were *Berghia* only. After removing  
346 genes with an adjusted p-value above 0.05, there were 3181 differentially expressed genes among  
347 all clusters. Forty percent (1279) of differentially expressed genes were unannotated, 39% (500) of  
348 which were shared between *Berghia* and at least 1 other species, and 61% (779) were from *Berghia*  
349 alone. Unannotated genes are expected for molluscs, where there is much less molecular data  
350 and functional characterization of these genes.

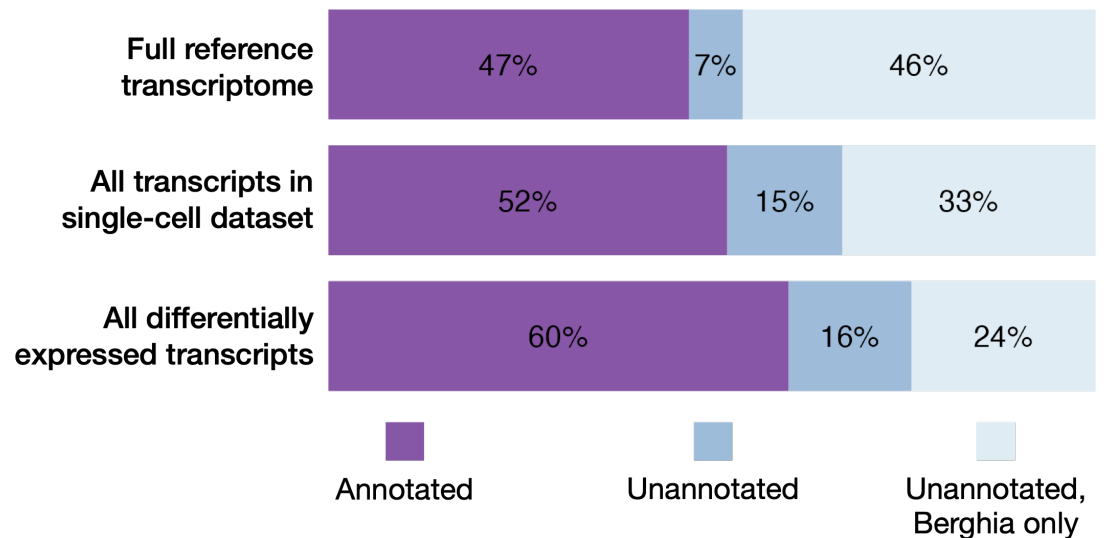

**Figure 14.** Stacked bar plots of the proportions of Hierarchical Orthogroups (HOGs) for different subsets of the transcriptome that were annotated, unannotated and shared between *Berghia* and at least one other species, or unannotated and *Berghia*-specific. The threshold for differentially expressed genes was a FDR adjusted p-value of less than 0.05.

351 We performed HCR for a small selection of unannotated DEGs. As described above, the gene  
352 *Bs0019097* was found broadly expressed in putative neuronal clusters in the single cell dataset,  
353 and the expression pattern of this gene in most cells that were neurons (see Fig. 4) supports the  
354 pattern found in the single cell atlas (see Fig. 3).

355 *Tph*-expressing serotonergic neurons formed a very small but distinct cluster in the atlas, and  
356 the expression patterns for genes in these cells, including *Tph*, *Unc-4*, and *Scf46m3* were validated  
357 using HCR (see Fig. 12). Expression of an unannotated gene from the list of DEGs for serotonergic  
358 neurons, *Bs0381707*, was restricted exclusively to *Tph*-expressing neurons, as expected for a top  
359 cluster marker gene (Fig. 15A,C).

360 Another unannotated gene, *Bs0384895* was differentially expressed in *rhg* neurons (Fig. 15C).  
361 Visualization of mRNA for this gene showed high, specific expression in neurons in the *rhg* (Fig. 15D).  
362 A small number of neurons outside of the *rhg* also express this gene, including a giant, unilateral,  
363 individually identifiable neuron in the right *pdg* (Fig. 15D). These validated examples, as well as the  
364 large percentage of unannotated, yet differentially expressed genes in the single cell atlas, support  
365 the idea that while unknown, these genes are important for neuronal function and deserve further  
366 study.

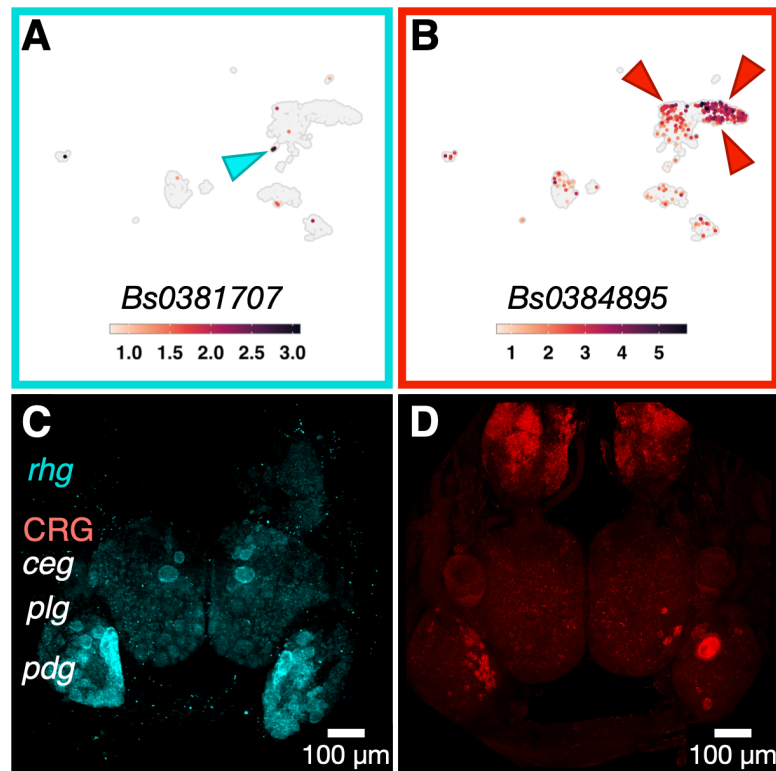

**Figure 15.** Differentially expressed, unannotated genes are expressed in a cluster-specific manner. A) UMAP plot for unannotated gene *Bs0381707* shows highest expression in the small cluster of *Tph*<sup>+</sup> neurons in the single cell dataset. B) UMAP plot for unannotated gene *Bs0384895* shows highest expression in *rhg* clusters in the single cell dataset. C) Z-projection of a fluorescence confocal image using HCR to label mRNA for *Bs0381707* shows its expression was exclusive to the serotonergic, *Tph*<sup>+</sup> neurons in the brain. D) Z-projection of a fluorescence confocal image using HCR to label for *Bs0384895* shows widespread, high expression in the *rhg*. However, there were also multiple, small, discrete groupings of *Bs0384895*<sup>+</sup> neurons in the *plg* and *pdg*, including one giant neuron in the *pdg*.

## 367 Discussion

368 Individually identifiable neurons are a hallmark of the gastropod CRG, including those of *Berghia*  
369 *stephanieae*. Soma size and location, axonal projections, physiological properties, and gene expres-  
370 sion signatures are all measurable phenotypes that can be used to assign individual identities to  
371 neurons. Yet, the molecular and developmental mechanisms by which neurons gain their distinct  
372 identities in gastropods is unknown. Similarly unknown are the genes that together make up the  
373 final mature molecular phenotypes for these neuron types. Only a small percentage of the neu-  
374 ronal population has been identified due in part to the inefficiency of methods previously used to  
375 characterize them. It is not currently known whether every neuron, or only a small subset, has an  
376 addressable molecular identity. Moreover, the focus on individual neurons has completely ignored  
377 whether there is ganglionic organization that could be revealed by molecular signatures of large  
378 numbers of neurons. Our study represents an important set of data necessary to begin addressing  
379 these questions in molluscan nervous systems.

380 Using a new study species, *Berghia stephanieae*, we created an annotated reference transcrip-  
381 tome and 1580 single cell transcriptomes from the CRG, and the *rhg*. Standard clustering and  
382 differential gene expression analyses generated lists of candidate genes that were explored us-  
383 ing multiplexed *in-situ* HCR. We found that there are several broad classes of neurons, some of  
384 which are regionally restricted and others of which are scattered throughout the brain. This ap-  
385 proach allowed us to map the locations of neurons based on neurotransmitter or neuropeptide  
386 phenotype without the concern about cross-reactivity of antibodies yielding false positives. The  
387 single-cell resolution of transcriptomic data also revealed candidate DEGs that were not previously  
388 known from other transcriptomic analyses of gastropod nervous systems. The results yielded sev-  
389 eral new insights into genes important for defining neuronal cell type identities and the molecular  
390 organization of gastropod nervous systems.

## 391 Glutamatergic and cholinergic neurons are widespread throughout the head gan- 392 glia

393 Neurons expressing markers for small molecule neurotransmitters (e.g., glutamate, acetylcholine,  
394 and GABA) were found in all the scRNAseq neuronal clusters. HCR for *Vglut* and *Chat* showed  
395 widespread distribution of neuronal somata in all ganglia, and of varying soma sizes. Thus, these  
396 two neuronal classes are large umbrella classes containing high numbers of different neuronal  
397 cell types. Glutamate and acetylcholine are likely to play major roles in neural circuits in *Berghia*  
398 as has been suggested by pharmacological studies in other nudibranchs (*Megalou et al., 2009*;  
399 *Sakurai and Katz, 2017*). In the nudibranch *Hermisenda*, both acetylcholine and GABA have been  
400 suggested as neurotransmitters in eye photoreceptors (*Heldman et al., 1979*; *Schultz and Clark,*  
401 *1997*). Contrasting with these previous findings, *Vglut*, but not *Chat* or *Gad*, was expressed in eye  
402 photoreceptors. Both *Vglut* and *Chat* were expressed in neurons in the optic ganglia. *Gad* mRNA  
403 was found in a small number of neurons in the scRNAseq atlas data as well as in the brain itself.  
404 *Gad* expression was consistent with previous studies of GABA IHC which showed a more restricted  
405 distribution across neurons in nudibranchs (*Gunaratne et al., 2014*; *Gunaratne and Katz, 2016*).

## 406 Serotonergic neurons form a distinct class with multiple neuronal cell types

407 In contrast to markers for glutamate, acetylcholine, and GABA, markers for serotonergic neurons  
408 were highly restricted to a single UMAP cluster and the somata were found in specific locations in  
409 the *ceg* and *pdg*. This distribution of somata was known previously from serotonin IHC in other  
410 nudibranch species (*Newcomb et al., 2006*). Many of these neurons have been studied for their  
411 roles in motor behaviors in other gastropods (*Getting et al., 1980*; *Jing and Gillette, 1999*; *Lillvis*  
412 *et al., 2012*; *Lillvis and Katz, 2013*; *Yeoman et al., 1994*; *Zhang et al., 2003*).

413 Because they formed a discrete cluster in the scRNAseq atlas, we were able to look for differen-  
414 tially expressed genes that were specific to serotonergic neurons. We found that all serotonergic  
415 neurons expressed *Unc-4*, but *Unc-4* expression was not restricted to those neurons (Fig. 12). In

416 contrast to our results from *Berghia*, *Unc-4* is primarily associated with cholinergic motor neurons  
417 in both *C. elegans* and *Drosophila* (*Lacin et al., 2020*; *Pflugrad et al., 1997*). This raises at least  
418 two potential evolutionary scenarios: *Unc-4* was co-opted from cholinergic neurons to also spec-  
419 ify serotonergic neurons or the neurons specified by *Unc-4* switched neurotransmitter phenotype.  
420 Because cholinergic neurons in *Berghia* are not also specified by *Unc-4*, the first scenario of co-  
421 option may be less likely. Therefore, an ancestral coding of an efferent neuronal type may have  
422 undergone a transmitter shift since the common ancestor of protostomes.

### 423 **Different patterns for neuropeptide expression**

424 We were able to recover evidence for expression of 40 neuropeptides, 35 of the 65 known mol-  
425 luscan neuropeptide families, which was unexpected given the small total number of single cell  
426 transcriptomes in the dataset. High complexity in our small sample of neurons suggests that many  
427 neuropeptides may be expressed in many different neuron types rather than being restricted, for  
428 the most part, to a single neuronal class. More extensive surveying may find combinatorial ex-  
429 pression of multiple neuropeptides in each neuron as seen in the giant ventral neuron, which  
430 expressed at least three neuropeptides: *APGWamide*, *Scp* and *Fcap* (Fig. 13). The survey of expres-  
431 sion patterns for 8 neuropeptides showed relatively little overlap of sampled neuropeptides in the  
432 same neurons (Fig. 9), again consistent with the high complexity of potential co-expression given  
433 the large number of expressed neuropeptides.

### 434 **Olfaction-associated genes show spatial organization in the rhinophore ganglia**

435 Neurons in two *rhg* clusters expressed *Nitric oxide synthase* (*Nos*). Nitric oxide (NO) signaling is used  
436 by neurons in the olfactory centers of many animals, including molluscs like the snail *Lymnaea*  
437 *stagnalis* (*Gelperin, 1994*). As nudibranch rhinophores are thought to be distance chemoreceptors,  
438 expression of *Nos* in the *rhg* is consistent with that function. Outside of the *rhg*, *Nos* was also found  
439 in some neurons in the *ceg* and *plg*. This is a broader distribution than would be expected by  
440 previous studies using IHC or NADPH diaphorase staining in other nudibranchs (*Hurst et al., 1999*;  
441 *Moroz and Gillette, 1996*; *Newcomb and Watson, 2001*).

442 The receptor for NO, *Soluble guanylate cyclase* (*Sgc*) (*Martin et al., 2005*) was differentially ex-  
443 pressed in the scRNAseq atlas in a separate cluster of *rhg* neurons than those expressing *Nos*. Mul-  
444 tiplexed HCR for *Nos* and *Sgc* in the *rhg* revealed the spatial separation of *Nos* and *Sgc*-expressing  
445 populations of neurons. This spatial organization of *Nos*, *Pdf*, and *Sgc*-expressing neurons in the  
446 *rhg* hints at complex structural organization of the *rhg*, a ganglion that has received significantly  
447 less attention than the CRG. This complexity would not have been apparent without both the abil-  
448 ity to detect differential gene expression between populations of neurons using high-throughput  
449 methods, and the ability to easily visualize the mRNA within those groups of neurons via HCR.

450 The expression of other olfaction-associated marker genes in the *rhg* is also consistent with the  
451 expected function of the rhinophores as distance chemoreceptors. One *Nos*-expressing *rhg* cluster  
452 in the scRNAseq atlas showed differential expression of the neuropeptide *Pigment-dispersing factor*  
453 (*Pdf*). Consistent with the separation seen in the scRNAseq atlas data, multiplexed HCR labeling  
454 of *Nos* and *Pdf* found populations of *Nos*-expressing *rhg* neurons that were spatially segregated  
455 from those that expressed both *Nos* and *Pdf*. In the snail *Helix*, *Pdf* is expressed in multiple parts  
456 of the CRG, including the procerebrum, thought to be their olfactory center (*Elekes and Nässel,*  
457 *1999*). *Enterin* is also differentially expressed in *rhg* clusters in the scRNAseq atlas. In the garden  
458 slug *Limax*, *Enterin* is expressed in their olfactory centers, the procerebrum and tentacular ganglia.  
459 Ectopic application of *Enterin* modulates local field potential oscillations in these ganglia (*Matsuo*  
460 *et al., 2020*).



461 **Expression of transcription factors (TFs) also reveals molecular organization at dif-**  
462 **ferent spatial scales within the head ganglia**

463 There are regional and ganglionic expression differences in transcription factors. Expression of  
464 *Six3/6*, a member of the *Six/sine oculis* family of homeobox containing TFs, is primarily restricted to  
465 the anterior-most major head ganglia (the *ceg* and *rhg*). This expression pattern is shared across  
466 bilaterians, including mammals (*Conte et al., 2005*), indicative of conservation of an ancestral role  
467 for *Six3/6* in delineating anterior portions of nervous systems.

468 The activity of TFs is usually associated with developmental processes in animals, but they also  
469 act as “terminal selectors” whose expression maintains mature neuronal phenotypes (*Hobert and*  
470 *Kratsios, 2019*). For example, despite its canonical role in early development, expression of *Delta* in  
471 mature neurons in adults has also been described in *Drosophila* and vertebrates (*Cornbrooks et al.,*  
472 *2007; Stump et al., 2002*). In *C. elegans*, *Delta (lin-12)* expression also influences locomotor behavior  
473 without changing cell type identities, indicating functions beyond development (*Chao et al., 2005*).  
474 Both *Six3/6* and *Delta* were DEGs in the glutamatergic *Sgc rhg* neuron cluster of the scRNAseq atlas.  
475 Multiplexed HCR showed that they were often co-expressed in *rhg* neurons. Yet *Six3/6* and *Delta*  
476 expression was not restricted only to the *rhg*, further supporting their role as a broad neuronal  
477 class marker.

478 Many other transcription factors were found in the scRNAseq data. Those TFs associated with  
479 neuroblasts and newly differentiated neurons like *Sox2*, *Sox6*, and *Scratch* were differentially and  
480 specifically expressed in one cluster in the scRNA-seq atlas. It is not yet clear whether there are  
481 neuroblasts in the brain itself—neurogenesis zones in other gastropods are thought to be in the  
482 body wall epithelium, with postmitotic neurons migrating into the CRG from the periphery (*Jacob,*  
483 *1984*).

484 **The prevalence of unannotated genes.**

485 “Conserved hypothetical proteins” (*Galperin and Koonin, 2004; Rocha et al., 2023*) have emerged  
486 as important foci for functional research. The importance of looking at these types of unannotated  
487 genes was highlighted by this project; unannotated genes made up approximately 40% of DEGs  
488 between clusters, both neuronal and non-neuronal. Although we did not specifically analyze the  
489 lineage conservation of unannotated genes in our dataset, we explicitly considered the conserva-  
490 tion of *Berghia* sequences with at least one other gastropod as part of the filtering of the reference  
491 transcriptome.

492 The expression of two such markers were visualized using HCR and the expression patterns  
493 corresponded specifically to their respective clusters. For example, *Bs0381707* is an unannotated  
494 gene shared among nudibranchs, and in *Berghia*, is only expressed in serotonergic neurons (Fig.  
495 15A,C). Another unannotated gene, *Bs0384895*, is highly expressed in *rhg* neurons and in a very  
496 restricted set of *pdg* neurons (Fig. 15B,D). While not a cluster-specific marker, unannotated gene  
497 *Bs0019097* was widely expressed in putative neuronal clusters and labeled neurons on all ganglia  
498 (Fig. 4). The exact nature of *Bs0019097* remains unknown, its distribution and co-expression with  
499 genes like *Elav-1* and *7B2* establishes it as a pan-neuronal marker.

500 The molecular genetics of gastropods has not been well characterized because of the difficulty  
501 in genetic manipulations to test gene function in these animals. Some unannotated genes were ex-  
502 pected based on the number of “hypothetical proteins” available in molluscan genomes, including  
503 a recent chromosome-level genome for *Berghia stephanieae* (*Goodheart et al., 2023*), and recent  
504 scRNAseq studies have also described unannotated genes as markers for specific populations of  
505 neurons in other molluscs (*Albertin et al., 2015; Songco-Casey et al., 2022; Styfhals et al., 2022*).  
506 The great number of unannotated genes shows how much there is to learn about these molecules  
507 and their functions in the nervous system.

## 508 **Gene expression profiles of individual neurons**

509 Because individual neurons can be identified in gastropods (*Croll, 1987; Katz and Quinlan, 2019;*  
510 *Leonard, 2000*), we expected to find that neurons would have clear molecular signatures. However,  
511 the methodology used here was biased against finding rare cells that did not share gene expression  
512 profile similarities with many other cells. That said, we were able to show that one neuron, the giant  
513 ventral peptidergic neuron, which is visually identifiable based on soma size and position, did have  
514 a particular signature. We found that this neuron expressed at least three neuropeptides and *Chat*.  
515 This suggests that intersectional, combinatorial and spatial transcriptomic analyses might provide  
516 gene expression fingerprints for other uniquely identifiable neurons.

## 517 **Functional implications of gene expression**

518 Suites of co-expressed genes that may represent evolutionarily conserved neuronal types were  
519 identified in the *Berghia* single cell dataset. For example, the co-expression of *Brn3* and *Vglut*, which  
520 was found in *Berghia*, suggests that these cells may be part of mechanosensory circuits, based on  
521 the known bilaterian molecular signature for mechanosensory-related neurons. It also suggests  
522 that these neurons are potential homologs of mechanosensory neurons in *Lymnaea* and *Aplysia*  
523 (*Brunet Avalos et al., 2019; Nomaksteinsky et al., 2013*). However, we did not find extensive co-  
524 expression of *Brn3* and *Sensorin-A* as was reported in S-cells / J,K cluster cells in other gastropods  
525 (*Nomaksteinsky et al., 2013*). Instead, a few cells adjacent to the S-cells expressed *Brn3*. There  
526 were a small number of neurons that did co-express these genes, but they were located at the  
527 lateral edges of the ganglia and clearly not part of the S-cell cluster.

## 528 **Multiple glial cell types, including giant glia**

529 Four types of glial cells were previously identified in other gastropods based on immunoreactivity  
530 to glial fibrillary acid protein (*Santos et al., 2002*). We identified three clusters of glial cells in the scR-  
531 NAseq data. A differentially expressed gene shared among the 3 glial clusters was *Apolipophorin*,  
532 which has been identified as a glial marker in recent single cell papers from other molluscs (*Styfhals*  
533 *et al., 2022*). *Apolipophorin* is known to be expressed in *Drosophila* astrocytes (*Yin et al., 2021*),  
534 strengthening its use as a glial marker in molluscs. HCR for *Apolipophorin* mRNA revealed a multi-  
535 tude of cells that are likely glia, including a handful of individually identifiable, giant encasing glial  
536 cells. Giant glia have been reported previously in leech ganglia (*Deitmer et al., 1999*). In leech,  
537 these segmental glia encase all neuronal soma. Here, we found that giant glia encased numerous  
538 neuronal soma, but the majority of neurons were associated with other, smaller glia, and not the  
539 giant glial cells. We do not yet understand the nature of the relationship between giant glia and  
540 the neurons they encase, nor whether there is a typical or functional significance to which neurons  
541 are encased.

## 542 **Summary**

543 Molluscs, and specifically gastropods, have been important study systems in neuroscience for  
544 decades from a cell and circuit perspective. This project shows that new egalitarian molecular  
545 tools can be applied to gastropods like *Berghia* to accelerate our understanding of the molecular  
546 bases for neuronal identity and function. This will expand the role for gastropods in modern neu-  
547 roscience. Gastropods, by virtue of their phylogenetic position as molluscs, provide an important  
548 counterpoint to other standard laboratory species to help establish general principles of nervous  
549 system structure and function.

## 550 **Methods and Materials**

### 551 ***Berghia* husbandry**

552 Adult *Berghia* were originally purchased from online suppliers Salty Underground (Crestwood, MO,  
553 USA) and Reef Town (Boynton Beach, FL, USA). They were housed in 5-gallon glass tanks with about

554 10 individuals. Multiple sea anemones (*Exaptasia diaphana*) were provided to each tank every other  
555 day as food. Colonies of *Exaptasia* were raised in 10-gallon tanks with continuously running filters  
556 and were fed every other day with freshly hatched *Artemia nauplii*, which were hatched every 2 days  
557 by placing 2.5g of freeze dried *Artemia* eggs into an aeration chamber with fresh artificial seawater  
558 (Instant Ocean Spectrum Brands, Blacksburg, VA). All animals were kept in the same room, which  
559 was held at 26°C to mimic conditions in *Berghia*'s ambient environment in the Florida Keys, USA.  
560 The room that housed all the animals was kept on a constant 12:12 light: dark cycle. Larger (~1.5cm),  
561 egg-laying adults were chosen from random tanks for dissection.

### 562 **Single neuron RNA sequencing**

563 Brains were dissected and treated in a mixture of 2% w/v pronase (Sigma-Aldrich, St. Louis, MO)  
564 and 0.2% w/v Liberase (Sigma-Aldrich, St. Louis, MO) in calcium-, magnesium-free artificial sea-  
565 water (CMFSW) to digest the ganglionic sheath. The rhinophore ganglia (*rhg*) were removed with  
566 scissors from the CRG at the connective. A total of 18 *rhg* pairs and 20 CRG samples were recover-  
567 ed. *rhg* and CRG samples were separately pooled to create one sample of each. The two samples  
568 were processed separately because of a large difference in the average size of the neurons; most  
569 of the *rhg* neurons were less than 10µm in diameter, whereas CRG neurons ranged from 10-60µm  
570 in diameter.

571 Each sample was triturated in a 400µL of CMFSW until a single-cell suspension was achieved  
572 with minimal cell clumps. CRG samples were mixed for 2 minutes with regular-bore P200 tip at  
573 a quick pace, 1 minute with wide-bore P200 tip at a slower pace, and 1 minute with regular-bore  
574 P200 tip at the same slow pace. *rhg* samples were mixed for 4 minutes with regular-bore P200 tip  
575 at a quick pace. Cell suspensions were filtered through a 400µL layer of 4% bovine serum albumin  
576 (BSA) in CMFSW at 4°C. The suspensions were then centrifuged in a swing bucket centrifuge at 4°C  
577 for 10 minutes at 100 x g for the CRG sample and for 6 minutes at 400 x g for the *rhg* sample.

578 After centrifugation, the cell pellets were resuspended in 1.5mL round bottom tubes (Eppendorf  
579 DNA LoBind, Eppendorf, Enfield, CT) with 400µL of CMFSW and fixed in 1.6mL of 100% methanol.  
580 Precipitants form at this step from the salt in CMFSW. We incubated tubes for 10 minutes at -20°C  
581 and centrifuged them in a swing bucket centrifuge for 5 minutes at 4°C and 500 x g. Two mL of 0.5%  
582 w/v BSA in 1X phosphate-buffered saline (PBS) was added to dissolve the salt. The suspensions  
583 were centrifuged again as above. 400µL of 0.5% w/v BSA in 1X PBS was added first then 1600µL of  
584 100% methanol were added drop by drop to fix the cells. The tubes were stored at -20°C overnight  
585 or for several weeks while additional samples were collected.

586 Single neuron library preparation and high-throughput sequencing cell suspensions were sent  
587 to the Bauer Core Facility at Harvard University for library preparation using the 10x Genomics  
588 Chromium platform. They also sequenced the single cell libraries on an Illumina NovaSeq.

### 589 **Bulk brain transcriptome library preparation and sequencing**

590 *Berghia* brains (CRG plus *rhg*) were dissected and put into lysis buffer from the Smart-Seq4 kit  
591 (Takara Bio USA Inc., San Jose, CA) and stored at -20°C. RNA was extracted from the brains and  
592 library prep performed following manufacturer's protocols. We used a magnetic mRNA isolation  
593 kit (New England BioLabs, Ipswich, MA) to enrich samples for mRNA before proceeding to library  
594 preparation. Prepared libraries yield was quantified using a Qubit dsDNA HS Assay Kit (Ther-  
595 moFisher Scientific, Waltham, MA) and library quality using the Agilent 2100 Bioanalyzer RNA 6000  
596 Pico assay (Agilent Technologies, Inc., Santa Clara, CA). Some samples could not be quantified be-  
597 cause the concentration was too low, but Bioanalyzer traces suggested a quality library, and so  
598 these samples were kept in the dataset. Bioanalyzer and bulk transcriptome sequencing was per-  
599 formed by the Genomics Resource Facility at the University of Massachusetts-Amherst using an  
600 Illumina Next-Seq 500.

601 **Brain transcriptome assembly, phylogenetic validation of transcripts and annota-**  
602 **tion**

603 The raw reads of the bulk brain samples as well as samples from tissues across the body of *Berghia*  
604 downloaded from NCBI (SRX10690963, SRX10690964, SRX10690965, SRX10003038, SRX10003039,  
605 SRX8599769, SRX8599770, SRX8599771, SRX8599772, SRX8599773, SRX8599774, SRX8599775) were  
606 concatenated and put into the Oyster River Protocol (ORP) (*MacManes, 2018*) pipeline for assembly.  
607 This pipeline uses multiple assemblers and multiple k-mers. This is necessary because different  
608 algorithms assemble true transcripts that are missed by others (*Smith-Unna et al., 2016*). The  
609 pipeline uses trimmomatic (*Bolger et al., 2014*) to trim reads to remove adapter sequences and  
610 low-quality reads. The cleaned reads are assembled using Trinity (*Grabherr et al., 2011*), Oases  
611 (*Schulz et al., 2012*) and SOAPdenovo (*Xie et al., 2014*). Orthofinder2 (*Emms and Kelly, 2018*) has  
612 been modified to concatenate sequences across transcriptomes from different assemblers to re-  
613 duce duplicate sequences. We used this same pipeline to assemble new brain transcriptomes for  
614 other nudibranch species. Raw reads for the *Dendronotus* brain transcriptome were uploaded to  
615 NCBI (BioProject PRJNA1009839). *Hermisenda* and *Melibe* brain raw reads were downloaded from  
616 NCBI (SRX811408; SRX1889794).

617 We used a phylogenetic approach to further consolidate the *Berghia* transcriptome and clear  
618 out spurious transcripts. We assumed that if a homologous transcript could be found in at least 2  
619 other gastropod species, that it is a real transcript. Orthofinder2 was used to create a list of *Berghia*  
620 transcripts that met those criteria. Orthofinder2 takes transcriptomes from multiple species and  
621 attempts to assign transcripts to hierarchical orthogroups (HOGs). Orthogroups are first created  
622 using diamond (*Buchfink et al., 2021*) to search and group transcripts from each species using se-  
623 quence similarity, MAFFT (*Katoh and Standley, 2013*) to align the sequences per orthogroup and  
624 FastTree (*Price et al., 2010*) to build a gene tree for each orthogroup. Orthofinder2 then uses  
625 the outputs of this first step to find single copy orthologs and create a species tree. Finally, Or-  
626 thofinder2 performs a gene-species tree reconciliation for each orthogroups' gene tree to identify  
627 the duplications and losses of orthologs and paralogs that can confuse proper assignment of or-  
628 thology and to place these events on each gene tree.

629 The output includes a list of each orthogroup, now put into a unique HOG after the gene-species  
630 tree reconciliation, and the transcripts from each species that are putative orthologs. We gave Or-  
631 thofinder2 the coding sequence transcriptomes from gastropod species with genomes, such as  
632 *Aplysia*, *Lottia* and *Pomacea*. We also included our *Berghia* transcriptomes as well as brain tran-  
633 scriptomes from multiple other nudibranch species, including *Melibe leonina*, *Dendronotus iris*, and  
634 *Hermisenda opalescens* (formerly identified as a sample from *Hermisenda crassicornis*). Finally, we  
635 included sequences for neuropeptides known from other lophotrochozoans that have been veri-  
636 fied in the marine worm *Platynereis dumerilli* taken from *De Oliveira et al. (2019)*. Any HOG that  
637 did not have a transcript from *Berghia*, or that had transcripts from fewer than two other species  
638 of gastropods were excluded from downstream analyses at this stage.

639 The *Berghia* transcriptome from ORP was annotated using EnTAP (*Hart et al., 2020*), and Trino-  
640 tate (*Ghaffari et al., 2014*). These annotations, along with those from *Aplysia*, *Pomacea*, and *Platynereis*  
641 were then assigned to HOGs, which could then be mapped onto transcripts from *Berghia*. We found  
642 this approach necessary because we found many unannotated transcripts were differentially ex-  
643 pressed between neurons using our single cell transcriptome data. It was difficult to know whether  
644 these represented true transcripts that do not share any similarity with annotated sequences, or  
645 chimeric or artifactual transcripts from assembly errors.

646 Final HOGs were selected based on the following criteria: 1) they include a sequence from  
647 *Berghia* and at least one other species or 2) the *Berghia* sequence was predicted as a complete pep-  
648 tide at least 30 amino acids long. While these permissive criteria may keep some sequences that  
649 are spurious or artifacts of assembly, we included them because we know that many neuropep-  
650 tides are fewer than 100 amino acids. Our expectation is that reads from single cell transcriptomes

651 should not map well to spurious sequences. For similar reasons, we kept sequences even if they  
652 could not be annotated using any publicly available database.

### 653 **Single cell gene expression clustering analysis and differential gene expression** 654 **analysis**

655 Raw reads for each sample type were processed for quality and adapters trimmed using HTStream  
656 (*Petersen et al., 2015*) with default settings. kallisto (*Bray et al., 2016*) was used to pseudo-map  
657 reads onto our reference transcriptome and bustools (*Melsted et al., 2021*) to generate gene  
658 counts per cell. After mapping, the outputs of bustools were imported into R using the bustools  
659 kbc command. Kneeplots were used to exclude empty droplets and those containing ambient RNA.  
660 A standard Seurat (*Hao et al., 2021*) normalization and analysis pipeline was used on the single cell  
661 transcriptomes. While exploring a preliminary analysis, we discovered that some cells expressing  
662 *Tryptophan hydroxylase* were labeled as *rhg*, despite evidence using serotonin IHC that there were  
663 no neurons in the *rhg* that were serotonergic (*Whitesel, 2021*). These cells also shared the exact  
664 barcode with another cell from the CRG sample within the cluster, which is highly statistically un-  
665 likely. We discovered that these "*rhg*" barcoded cells were likely an artefact of multiplexing, which  
666 is common to single cell RNA sequencing datasets but not often considered (*Griffiths et al., 2018*).  
667 To resolve this issue within the entire dataset and recover cells rather than remove them entirely,  
668 similar principles as (*Griffiths et al., 2018*) were used to determine the most likely sample of origin.  
669 When a barcode was shared, the number of UMIs (Unique Molecular Identifiers) were counted.  
670 There was a clear split for most cells of the proportion of UMIs present from one sample or the  
671 other. A barcode was called for either the CRG or *rhg* sample if it contained at least 70% of the  
672 total UMIs with the shared barcode. The other cells was removed from the dataset before further  
673 processing with Seurat as follows. Briefly, each sample type was imported separately, and genes  
674 that were not expressed in at least 3 cells, and cells expressing fewer than 200 genes were ex-  
675 cluded. The data were merged while keeping track of the origins of data for each cell and checked  
676 for batch effects looking at the number of UMIs and genes in each sample. There was no evidence  
677 for batch effects, so all downstream analyses were performed on both samples combined. After  
678 removing cells that failed to meet the above criteria, counts for each gene were normalized by  
679 the total expression in each cell, scaled by multiplying by 10,000, and finally log-transformed. The  
680 FindVariableFeatures command was used to identify the 2000 most highly variable genes.

681 After running a principal component (PC) analysis, the first 50 PCs were included in dimension-  
682 ality reductions using tSNE (t-distributed Stochastic Neighborhood Embedding, resolution 3) and  
683 UMAP (Uniform Manifold Approximation and Projection) methods as implemented in Seurat. To  
684 select the resolution used in tSNE, Clustree (*Zappia and Oshlack, 2018*) was used to look at the  
685 effect of changing tSNE resolution on the stability of clusters. The highest resolution value used  
686 showed only low instability of cells in clusters compared to the next smallest value. We looked for  
687 differentially expressed genes between clusters using the FindMarker command in Seurat, using  
688 MAST (*Dal Molin et al., 2017; Finak et al., 2015*). Clusters where differentially expressed genes  
689 were mostly the same were collapsed together using the Clustree results. There were 14 clusters  
690 in the final analysis. We used the FeaturePlot and DoHeatmap commands in Seurat to visualize  
691 gene expression. We also used the R package *nebulosa* (*Alquicira-Hernandez and Powell, 2021*) to  
692 estimate the kernel density of expression for genes of interest. SCpubr was used to produce UMAP  
693 plots, dot plots and heatmaps (*Blanco-Carmona, 2022*). Figures were composed using Graphic (Au-  
694 todesk, San Francisco, CA, USA). All code and files used for these analyses are available on [Github](#).

### 695 **Creating DNA probes for in-situ Hybridization Chain Reaction (HCR)**

696 BLASTP (*Altschul et al., 1990; Camacho et al., 2009*) was used with queries from *Aplysia* and *Lym-*  
697 *naea* to look for candidate genes in the reference transcriptome. ExPASy Translate (*Gasteiger et al.,*  
698 *2003*) was used to translate the nucleotide sequence into amino acids for possible reading frames,  
699 to determine whether the sequence was the sense or anti-sense strand. If the sequence was anti-



700 sense, the reverse complement of the sequence was identified using the online Sequence Ma-  
701 nipulation Suite's reverse-complement tool (*Stothard, 2000*). The longest predicted peptide was  
702 selected and used BLAST on NCBI databases to verify that the best hits for the predicted peptide  
703 matched the query sequence where possible. The best BLAST hits needed to be from molluscs  
704 and have the same annotation where annotations were available. Sequences for the probe sets  
705 for each gene were made using HCRProbeMaker V3 (*Kuehn et al., 2021*) with the sense strand,  
706 based on the requirements necessary for HCR found in (*Choi et al., 2018*). This script found a  
707 user-selected number of probe pairs that would bind to the target mRNA sequence with 2 base  
708 pairs in between and added one of 5 initiator sequences to each partner that are necessary for  
709 the initiation of the fluorescent hybridization chain reaction. Probe set oligos from this script were  
710 synthesized by IDT (Integrated DNA Technologies, Coralville, IA, USA) and the lyophilized probes  
711 were rehydrated with 50  $\mu$ l TE buffer to end up with a 50 picomolar stock concentration. Probe  
712 sets for *Choline acetyltransferase* (54 probe pairs) and *APGWamide* (20 probe pairs), as well as the  
713 fluorescent hairpins were purchased from Molecular Instruments (Los Angeles, CA, USA).

### 714 Labeling transcripts using HCR

715 Hybridization chain reaction reagents were made using the recipes from (*Choi et al., 2018*), substi-  
716 tuting urea one-for-one instead of formamide. This substitution has been tested for traditional col-  
717 orimetric *in-situ* hybridizations and shown to be equally effective (*Sinigaglia et al., 2018*). Both the  
718 formamide and urea formulations were compared using HCR, without any appreciable difference  
719 in results. Urea-based hybridization solutions were used for all HCR to minimize use of hazardous  
720 reagents. Samples were fixed for at least 2 hours (at room temperature) to overnight (at 4° C) in  
721 4% paraformaldehyde (Electron Microscopy Sciences, Hatfield, PA, USA) in artificial sea water. After  
722 fixation, samples were washed briefly in phosphate-buffered saline (PBS, ThermoFisher Scientific,  
723 Agawam, MA, USA) and then dehydrated through a series from 100% PBS to 100% methanol. Sam-  
724 ples in methanol were stored at least overnight at -20° C.

725 On the first day of HCR processing, samples were rehydrated in series into 100% 5X sodium  
726 citrate saline (SSC, diluted from 20X stock solution, (Thermofisher Scientific, Agawam, MA, USA)  
727 and 0.1% Tween-20 added (SSCT). They sat in 5X SSCT at room temperature for at least 15 minutes  
728 before being moved to a tube containing 200 $\mu$ L of hybridization buffer in a heat block set to 37°  
729 C to equilibrate for at least 30 minutes. During this time, probe sets for each gene were thawed at  
730 room temperature, and a small volume was mixed into 100 $\mu$ L of fresh hybridization buffer. The  
731 concentration of probe needed for successful labeling varied between probe sets, from 0.1 pico-  
732 molar to 1 picomolar. After equilibration in hybridization buffer, as much of the used buffer was  
733 removed from the tube as possible while keeping the sample submerged. The probe-hybridization  
734 buffer mixture was then added to the tube, and the sample incubated overnight at 37° C.

735 The following day, the samples were washed in hybridization wash twice for 5 minutes, and  
736 twice for 30 minutes at 37° C. During the final 30-minute wash, the appropriate Alexa-dye-tagged  
737 hairpins for each initiator were thawed at room temperature in the dark. Hairpins with Alexa 488,  
738 546, 594 or 647 dyes were used to multiplex labeling of 2-3 genes per sample. 2 $\mu$ L of each hairpin  
739 pair per initiator were used in a final volume of 100 $\mu$ L amplification buffer. Each hairpin solution  
740 was aliquoted into a 0.2mL PCR strip tube. Hairpins were then "snapped" to linearize them by  
741 heating at 95° C for 90 seconds followed by 30 minutes of cooling at room temperature in the dark.  
742 All hairpins were then added to the appropriate volume of amplification buffer to a final volume of  
743 100 $\mu$ l. The hybridization chain reaction occurred in the amplification buffer for 1 or 2 overnights at  
744 room temperature in the dark. The length of amplification time was determined empirically, but in  
745 general, highly expressed genes needed less amplification time, and the lowest expressed genes  
746 needed the longest time.

747 After amplification, the samples were washed in 5x SSCT once. The nuclei were labeled using  
748 1 $\mu$ L 300uM DAPI : 1000 $\mu$ L 5x SSCT, rotating in the dark for 1 hour. Brains were mounted onto  
749 long coverglass using 2 small strips of double-sided tape (Scotch Brand, 3M, Saint Paul, MN) as



750 spacers and to attach the small coverglass. Vectashield Vibrance (Vector Laboratories, Newark,  
751 CA), DeepClear (*Pende et al., 2020*), or a fructose-glycerol solution (*Elagoz et al., 2022*) was used  
752 to clear and mount the samples for confocal imaging. Each probeset was tested at least twice to  
753 ensure consistent labeling.

### 754 **Confocal imaging of multiplexed HCR samples and image processing**

755 Fluorescent confocal images were taken at 20x using the Nikon A1R-25 or A1R-18 at the Light Mi-  
756 croscopy Facility at the University of Massachusetts-Amherst. Images were processed in ImageJ to  
757 rotate the image as needed, normalize intensity, adjust brightness and contrast, and create scale  
758 bars.

### 759 **Acknowledgments**

760 We would like to thank Drs. Duygu Özpolat and Ryan Null for creating HCR probeset develop-  
761 ment tools. Drs. Deidre Lyons and Jessica Goodheart provided valuable input and annotations  
762 for the reference transcriptome. Implementation of MHD-clearing, lightsheet imaging was done  
763 with help from Drs. Joseph Bergan and Joseph Dwyer. We thank Dr. Adriano Senatore for use of  
764 an unpublished *Dendronotus* transcriptome. Fran De Mora Ocana and Ryan Allen Wight produced  
765 replicate HCR samples for several gene sets. Single cell library preparation and sequencing was  
766 done through The Bauer Core Facility at Harvard University. Bulk sequencing of *Berghia* brain sam-  
767 ples was performed by the Genomics Resource Laboratory, University of Massachusetts Amherst.  
768 Confocal imaging was performed at the Light Microscopy Facility at the Institute for Applied Life  
769 Sciences, University of Massachusetts Amherst. This project was funded by a NSF Postdoctoral  
770 Research Fellowship in Biology PRFB 1812017 to MDR, and NIH grants U01-NS108637 and U01-  
771 NS123972 to PSK.

### 772 **References**

- 773 **Albertin CB**, Simakov O, Mitros T, Wang ZY, Pungor JR, Edsinger-Gonzales E, Brenner S, Ragsdale CW, Rokhsar  
774 DS. The octopus genome and the evolution of cephalopod neural and morphological novelties. *Nature*. 2015  
775 Aug; 524(7564):220–224.
- 776 **Alquicira-Hernandez J**, Powell JE. *Nebulosa* recovers single cell gene expression signals by kernel density  
777 estimation. *Bioinformatics*. 2021 Jan; .
- 778 **Altschul SF**, Gish W, Miller W, Myers EW, Lipman DJ. Basic local alignment search tool. *J Mol Biol*. 1990 Oct;  
779 215(3):403–410.
- 780 **Arey LB**. The multiple sensory activities of the so-called rhinophore of nudibranchs. *American Journal of*  
781 *Physiology-Legacy Content*. 1918; .
- 782 **Aspre JST**, Lee B, Wu CS, Vadakkan T, Dickinson ME, Lu HC, Lee SK. LMO4 functions as a co-activator of  
783 neurogenin 2 in the developing cortex. *Development*. 2011 Jul; 138(13):2823–2832.
- 784 **Bernier G**, Panitz F, Zhou X, Hollemann T, Gruss P, Pieler T. Expanded retina territory by midbrain transforma-  
785 tion upon overexpression of Six6 (Otx2) in *Xenopus* embryos. *Mech Dev*. 2000 May; 93(1-2):59–69.
- 786 **Bettenhausen B**, Hrabě de Angelis M, Simon D, Guénet JL, Gossler A. Transient and restricted expression  
787 during mouse embryogenesis of Dll1, a murine gene closely related to *Drosophila* Delta. *Development*. 1995  
788 Aug; 121(8):2407–2418.
- 789 **Blanco-Carmona E**. Generating publication ready visualizations for Single Cell transcriptomics using SCpubr;  
790 2022.
- 791 **Bolger AM**, Lohse M, Usadel B. Trimmomatic: a flexible trimmer for Illumina sequence data. *Bioinformatics*.  
792 2014 Aug; 30(15):2114–2120.
- 793 **Bray NL**, Pimentel H, Melsted P, Pachter L. Near-optimal probabilistic RNA-seq quantification. *Nat Biotechnol*.  
794 2016 May; 34(5):525–527.

- 795 **Brunet Avalos C**, Maier GL, Bruggmann R, Sprecher SG. Single cell transcriptome atlas of the *Drosophila* larval  
796 brain. *Elife*. 2019 Nov; 8.
- 797 **Bryant DM**, Johnson K, DiTommaso T, Tickle T, Couger MB, Payzin-Dogru D, Lee TJ, Leigh ND, Kuo TH, Davis FG,  
798 Bateman J, Bryant S, Guzikowski AR, Tsai SL, Coyne S, Ye WW, Freeman RM Jr, Peshkin L, Tabin CJ, Regev A,  
799 et al. A Tissue-Mapped *Axolotl* De Novo Transcriptome Enables Identification of Limb Regeneration Factors.  
800 *Cell Rep*. 2017 Jan; 18(3):762–776.
- 801 **Buchfink B**, Reuter K, Drost HG. Sensitive protein alignments at tree-of-life scale using DIAMOND. *Nat Methods*.  
802 2021 Apr; 18(4):366–368.
- 803 **Buescher M**, Hing FS, Chia W. Formation of neuroblasts in the embryonic central nervous system of *Drosophila*  
804 *melanogaster* is controlled by SoxNeuro. *Development*. 2002 Sep; 129(18):4193–4203.
- 805 **Camacho C**, Coulouris G, Avagyan V, Ma N, Papadopoulos J, Bealer K, Madden TL. BLAST+: architecture and  
806 applications. *BMC Bioinformatics*. 2009 Dec; 10:421.
- 807 **Chao MY**, Larkins-Ford J, Tucey TM, Hart AC. lin-12 Notch functions in the adult nervous system of *C. elegans*.  
808 *BMC Neurosci*. 2005 Jul; 6:45.
- 809 **Chitnis A**, Henrique D, Lewis J, Ish-Horowitz D, Kintner C. Primary neurogenesis in *Xenopus* embryos regulated  
810 by a homologue of the *Drosophila* neurogenic gene Delta. *Nature*. 1995 Jun; 375(6534):761–766.
- 811 **Choi HMT**, Schwarzkopf M, Fornace ME, Acharya A, Artavanis G, Stegmaier J, Cunha A, Pierce NA. Third-  
812 generation in situ hybridization chain reaction: multiplexed, quantitative, sensitive, versatile, robust. *De-*  
813 *velopment*. 2018 Jun; 145(12).
- 814 **Conte I**, Morcillo J, Bovolenta P. Comparative analysis of Six 3 and Six 6 distribution in the developing and adult  
815 mouse brain. *Dev Dyn*. 2005 Nov; 234(3):718–725.
- 816 **Cornbrooks C**, Bland C, Williams DW, Truman JW, Rand MD. Delta expression in post-mitotic neurons identifies  
817 distinct subsets of adult-specific lineages in *Drosophila*. *Dev Neurobiol*. 2007 Jan; 67(1):23–38.
- 818 **Croll RP**. Identified neurons and cellular homologies. *Nervous systems in invertebrates*. 1987; .
- 819 **Croll RP**. Catecholamine-containing cells in the central nervous system and periphery of *Aplysia californica*. *J*  
820 *Comp Neurol*. 2001; 441(2):91–105.
- 821 **Cummins SF**, Wyeth RC. Olfaction in gastropods. *Neuroecology and neuroethology in molluscs: The interface*  
822 *between behaviour and environment*. 2014; 1:45–72.
- 823 **Dal Molin A**, Baruzzo G, Di Camillo B. Single-Cell RNA-Sequencing: Assessment of Differential Expression Anal-  
824 *ysis Methods*. *Front Genet*. 2017 May; 8:62.
- 825 **De Oliveira AL**, Calcino A, Wanninger A. Extensive conservation of the proneuropeptide and peptide prohormone  
826 complement in mollusks. *Sci Rep*. 2019 Mar; 9(1):4846.
- 827 **Deitmer JW**, Rose CR, Munsch T, Schmidt J, Nett W, Schneider HP, Lohr C. Leech giant glial cell: functional role  
828 in a simple nervous system. *Glia*. 1999 Dec; 28(3):175–182.
- 829 **D’Este L**, Casini A, Kimura S, Bellier JP, Ito E, Kimura H, Renda TG. Immunohistochemical demonstration of  
830 cholinergic structures in central ganglia of the slug (*Limax maximus*, *Limax valentianus*). *Neurochem Int*.  
831 2011 Apr; 58(5):605–611.
- 832 **Dwyer J**, Ramirez MD, Katz PS, Karlstrom RO, Bergan J. Accelerated clearing and molecular labeling of biological  
833 tissues using magnetohydrodynamic force. *Sci Rep*. 2021 Aug; 11(1):16462.
- 834 **Elagoz AM**, Styfhals R, Maccuro S, Masin L, Moons L, Seuntjens E. Optimization of Whole Mount RNA Multiplexed  
835 in situ Hybridization Chain Reaction With Immunohistochemistry, Clearing and Imaging to Visualize Octopus  
836 Embryonic Neurogenesis. *Front Physiol*. 2022 May; 13:882413.
- 837 **Elekes K**, Nässel DR. Pigment-dispersing hormone-like immunoreactive neurons in the central nervous system  
838 of the gastropods, *Helix pomatia* and *Lymnaea stagnalis*. *Cell Tissue Res*. 1999 Feb; 295(2):339–348.
- 839 **Emms DM**, Kelly S. OrthoFinder2: fast and accurate phylogenomic orthology analysis from gene sequences;  
840 2018.

- 841 **Eng LF**. Glial fibrillary acidic protein (GFAP): the major protein of glial intermediate filaments in differentiated  
842 astrocytes. *J Neuroimmunol*. 1985 Jun; 8(4-6):203-214.
- 843 **Eng LF**, Ghirnikar RS, Lee YL. Glial Fibrillary Acidic Protein: GFAP-Thirty-One Years (1969-2000). *Neurochem*  
844 *Res*. 2000 Oct; 25(9):1439-1451.
- 845 **Finak G**, McDavid A, Yajima M, Deng J, Gersuk V, Shalek AK, Slichter CK, Miller HW, McElrath MJ, Pric M, Linsley PS,  
846 Gottardo R. MAST: a flexible statistical framework for assessing transcriptional changes and characterizing  
847 heterogeneity in single-cell RNA sequencing data. *Genome Biol*. 2015 Dec; 16:278.
- 848 **Galperin MY**, Koonin EV. 'Conserved hypothetical' proteins: prioritization of targets for experimental study.  
849 *Nucleic Acids Res*. 2004 Oct; 32(18):5452-5463.
- 850 **Gasteiger E**, Gattiker A, Hoogland C, Ivanyi I, Appel RD, Bairoch A. ExPASy: The proteomics server for in-depth  
851 protein knowledge and analysis. *Nucleic Acids Res*. 2003 Jul; 31(13):3784-3788.
- 852 **Gavriouchkina D**, Tan Y, Ziadi-Künzli F, Hasegawa Y, Piovani L, Zhang L, Sugimoto C, Luscombe N, Marlétaz F,  
853 Rokhsar DS. A single-cell atlas of bobtail squid visual and nervous system highlights molecular principles of  
854 convergent evolution; 2022.
- 855 **Gelperin A**. Nitric oxide mediates network oscillations of olfactory interneurons in a terrestrial mollusc. *Nature*.  
856 1994 May; 369(6475):61-63.
- 857 **Getting PA**, Lennard PR, Hume RI. Central pattern generator mediating swimming in *Tritonia*. I. Identification  
858 and synaptic interactions. *J Neurophysiol*. 1980 Jul; 44(1):151-164.
- 859 **Getting PA**. Afferent neurons mediating escape swimming of the marine mollusc, *Tritonia*. *J Comp Physiol A*  
860 *Neuroethol Sens Neural Behav Physiol*. 1976; 110(3):271-286.
- 861 **Ghaffari N**, Sanchez-Flores A, Doan R, Garcia-Orozco KD, Chen PL, Ochoa-Leyva A, Lopez-Zavala AA, Carrasco JS,  
862 Hong C, Briebe LG, Rudiño-Piñera E, Blood PD, Sawyer JE, Johnson CD, Dindot SV, Sotelo-Mundo RR, Criscitiello  
863 MF. Novel transcriptome assembly and improved annotation of the whiteleg shrimp (*Litopenaeus vannamei*),  
864 a dominant crustacean in global seafood mariculture. *Sci Rep*. 2014 Nov; 4:7081.
- 865 **Gold KS**, Brand AH. Optix defines a neuroepithelial compartment in the optic lobe of the *Drosophila* brain.  
866 *Neural Dev*. 2014 Jul; 9:18.
- 867 **Goodheart JA**, Rio RA, Taraporevala NF, Fiorenza RA, Barnes SR, Morrill K, Jacob MAC, Whitesel C, Masterson P,  
868 Batzel GO, Johnston HT, Desmond Ramirez M, Katz PS, Lyons DC. A chromosome-level genome for the nudi-  
869 branch gastropod *Berghia stephanieae* helps parse clade-specific gene expression in novel and conserved  
870 phenotypes; 2023.
- 871 **Grabherr MG**, Haas BJ, Yassour M, Levin JZ, Thompson DA, Amit I, Adiconis X, Fan L, Raychowdhury R, Zeng  
872 Q, Chen Z, Mauceli E, Hacohen N, Gnirke A, Rhind N, di Palma F, Birren BW, Nusbaum C, Lindblad-Toh K,  
873 Friedman N, et al. Full-length transcriptome assembly from RNA-Seq data without a reference genome. *Nat*  
874 *Biotechnol*. 2011 May; 29(7):644-652.
- 875 **Griffiths JA**, Richard AC, Bach K, Lun ATL, Marioni JC. Detection and removal of barcode swapping in single-cell  
876 RNA-seq data. *Nat Commun*. 2018 Jul; 9(1):2667.
- 877 **Gunaratne CA**, Katz PS. Comparative mapping of GABA-immunoreactive neurons in the buccal ganglia of  
878 *Nudipleura* molluscs. *J Comp Neurol*. 2016 Apr; 524(6):1181-1192.
- 879 **Gunaratne CA**, Sakurai A, Katz PS. Comparative mapping of GABA-immunoreactive neurons in the central  
880 nervous systems of nudibranch molluscs. *J Comp Neurol*. 2014 Mar; 522(4):794-810.
- 881 **Halter DA**, Urban J, Rickert C, Ner SS, Ito K, Travers AA, Technau GM. The homeobox gene repo is required  
882 for the differentiation and maintenance of glia function in the embryonic nervous system of *Drosophila*  
883 *melanogaster*. *Development*. 1995 Feb; 121(2):317-332.
- 884 **Hao Y**, Hao S, Andersen-Nissen E, Mauck WM 3rd, Zheng S, Butler A, Lee MJ, Wilk AJ, Darby C, Zager M, Hoffman  
885 P, Stoeckius M, Papalexi E, Mimitou EP, Jain J, Srivastava A, Stuart T, Fleming LM, Yeung B, Rogers AJ, et al.  
886 Integrated analysis of multimodal single-cell data. *Cell*. 2021 Jun; 184(13):3573-3587.e29.
- 887 **Hart AJ**, Ginzburg S, Xu MS, Fisher CR, Rahmatpour N, Mitton JB, Paul R, Wegrzyn JL. EnTAP: Bringing faster  
888 and smarter functional annotation to non-model eukaryotic transcriptomes. *Mol Ecol Resour*. 2020 Mar;  
889 20(2):591-604.

- 890 **Heldman E**, Grossman Y, Jerussi TP, Alkon DL. Cholinergic features of photoreceptor synapses in *Hermisenda*.  
891 *J Neurophysiol.* 1979 Jan; 42(1 Pt 1):153–165.
- 892 **Henrique D**, Adam J, Myat A, Chitnis A, Lewis J, Ish-Horowitz D. Expression of a Delta homologue in prospective  
893 neurons in the chick. *Nature.* 1995 Jun; 375(6534):787–790.
- 894 **Hnasko TS**, Edwards RH. Neurotransmitter corelease: Mechanism and physiological role. *Annu Rev Physiol.*  
895 2012 Mar; 74(1):225–243.
- 896 **Hobert O**, Kratsios P. Neuronal identity control by terminal selectors in worms, flies, and chordates. *Curr Opin*  
897 *Neurobiol.* 2019 Jun; 56:97–105.
- 898 **Hurst WJ**, Moroz LL, Gillette MU, Gillette R. Nitric oxide synthase immunolabeling in the molluscan CNS and  
899 peripheral tissues. *Biochem Biophys Res Commun.* 1999 Aug; 262(2):545–548.
- 900 **Hwang JR**, Siekhaus DE, Fuller RS, Taghert PH, Lindberg I. Interaction of *Drosophila melanogaster* prohormone  
901 convertase 2 and 7B2. Insect cell-specific processing and secretion. *J Biol Chem.* 2000 Jun; 275(23):17886–  
902 17893.
- 903 **Itoh Y**, Moriyama Y, Hasegawa T, Endo TA, Toyoda T, Gotoh Y. Scratch regulates neuronal migration onset via  
904 an epithelial-mesenchymal transition-like mechanism. *Nat Neurosci.* 2013 Feb; 16(4):416–425.
- 905 **Jacob MH**. Neurogenesis in *Aplysia californica* resembles nervous system formation in vertebrates. *J Neurosci.*  
906 1984 May; 4(5):1225–1239.
- 907 **Jing J**, Gillette R. Central pattern generator for escape swimming in the notaspid sea slug *Pleurobranchaea*  
908 *californica*. *J Neurophysiol.* 1999 Feb; 81(2):654–667.
- 909 **Katoh K**, Standley DM. MAFFT multiple sequence alignment software version 7: improvements in performance  
910 and usability. *Mol Biol Evol.* 2013 Apr; 30(4):772–780.
- 911 **Katz PS**, Quinlan PD. The importance of identified neurons in gastropod molluscs to neuroscience. *Curr Opin*  
912 *Neurobiol.* 2019 Jun; 56:1–7.
- 913 **Kawaguchi D**, Yoshimatsu T, Hozumi K, Gotoh Y. Selection of differentiating cells by different levels of delta-  
914 like 1 among neural precursor cells in the developing mouse telencephalon. *Development.* 2008 Dec;  
915 135(23):3849–3858.
- 916 **Kuehn E**, Clausen DS, Null RW, Metzger BM, Willis AD, Özpölat BD. Segment number threshold determines  
917 juvenile onset of germline cluster expansion in *Platynereis dumerilii*. *J Exp Zool B Mol Dev Evol.* 2021 Nov; .
- 918 **Lacin H**, Williamson WR, Card GM, Skeath JB, Truman JW. Unc-4 acts to promote neuronal identity and devel-  
919 opment of the take-off circuit in the *Drosophila* CNS. *Elife.* 2020 Mar; 9.
- 920 **Lee KE**, Seo J, Shin J, Ji EH, Roh J, Kim JY, Sun W, Muhr J, Lee S, Kim J. Positive feedback loop between Sox2 and  
921 Sox6 inhibits neuronal differentiation in the developing central nervous system. *Proc Natl Acad Sci U S A.*  
922 2014 Feb; 111(7):2794–2799.
- 923 **Lein ES**, Hawrylycz MJ, Ao N, Ayres M, Bensinger A, Bernard A, Boe AF, Boguski MS, Brockway KS, Byrnes EJ, Chen  
924 L, Chen L, Chen TM, Chin MC, Chong J, Crook BE, Czaplinska A, Dang CN, Datta S, Dee NR, et al. Genome-wide  
925 atlas of gene expression in the adult mouse brain. *Nature.* 2007 Jan; 445(7124):168–176.
- 926 **Leonard JL**. Identifiable neurons in invertebrates: From invariant cells to dynamic systems. Verlag S. Karger;  
927 2000.
- 928 **Li L**, Medina-Menéndez C, García-Corzo L, Córdoba-Beldad CM, Quiroga AC, Calleja Barca E, Zinchuk V, Muñoz-  
929 López S, Rodríguez-Martín P, Ciorraga M, Colmena I, Fernández S, Vicario C, Nicolis SK, Lefebvre V, Mira H,  
930 Morales AV. SoxD genes are required for adult neural stem cell activation. *Cell Rep.* 2022 Feb; 38(5):110313.
- 931 **Lillvis JL**, Gunaratne CA, Katz PS. Homology and homoplasy of swimming behaviors and neural circuits in the  
932 *Nudipleura* (Mollusca, Gastropoda, Opisthobranchia). *Proceedings of the.* 2012; .
- 933 **Lillvis JL**, Katz PS. Parallel evolution of serotonergic neuromodulation underlies independent evolution of  
934 rhythmic motor behavior. *J Neurosci.* 2013 Feb; 33(6):2709–2717.
- 935 **Linser PJ**, Trapido-Rosenthal HG, Orona E. Glutamine synthetase is a glial-specific marker in the olfactory  
936 regions of the lobster (*Panulirus argus*) nervous system. *Glia.* 1997 Aug; 20(4):275–283.

- 937 **MacManes MD**. The Oyster River Protocol: a multi-assembler and kmer approach for de novo transcriptome  
938 assembly. *PeerJ*. 2018 Aug; 6:e5428.
- 939 **Manzanares M**, Locascio A, Nieto MA. The increasing complexity of the Snail gene superfamily in metazoan  
940 evolution. *Trends Genet*. 2001 Apr; 17(4):178–181.
- 941 **Marcinkiewicz M**, Touraine P, Chrétien M. Pan-neuronal mRNA expression of the secretory polypeptide 7B2.  
942 *Neurosci Lett*. 1994 Aug; 177(1-2):91–94.
- 943 **Martin E**, Berka V, Tsai AL, Murad F. Soluble guanylyl cyclase: the nitric oxide receptor. *Methods Enzymol*.  
944 2005; 396:478–492.
- 945 **Matsuo R**, Kobayashi S, Furuta A, Osugi T, Takahashi T, Satake H, Matsuo Y. Distribution and physiological effect  
946 of enterin neuropeptides in the olfactory centers of the terrestrial slug *Limax*. *J Comp Physiol A Neuroethol*  
947 *Sens Neural Behav Physiol*. 2020 May; 206(3):401–418.
- 948 **Megalou EV**, Brandon CJ, Frost WN. Evidence that the swim afferent neurons of tritonia diomedea are gluta-  
949 matergic. *Biol Bull*. 2009 Apr; 216(2):103–112.
- 950 **Melsted P**, Boeshaghi AS, Liu L, Gao F, Lu L, Min KHJ, da Veiga Beltrame E, Hjörleifsson KE, Gehring J, Pachter  
951 L. Modular, efficient and constant-memory single-cell RNA-seq preprocessing. *Nat Biotechnol*. 2021 Jul;  
952 39(7):813–818.
- 953 **Moroz LL**, Gillette R. NADPH-diaphorase localization in the CNS and peripheral tissues of the predatory sea-slug  
954 *Pleurobranchaea californica*. *J Comp Neurol*. 1996 Apr; 367(4):607–622.
- 955 **Nakakura EK**, Watkins DN, Schuebel KE, Sriuranpong V, Borges MW, Nelkin BD, Ball DW. Mammalian Scratch:  
956 A neural-specific Snail family transcriptional repressor. *Proceedings of the National Academy of Sciences*.  
957 2001; 98(7):4010–4015.
- 958 **Newcomb JM**, Watson WH 3rd. Identifiable nitrergic neurons in the central nervous system of the nudibranch  
959 *Melibe leonina* localized with NADPH-diaphorase histochemistry and nitric oxide synthase immunoreactivity.  
960 *J Comp Neurol*. 2001 Aug; 437(1):70–78.
- 961 **Newcomb JM**, Fickbohm DJ, Katz PS. Comparative mapping of serotonin-immunoreactive neurons in the cen-  
962 tral nervous systems of nudibranch molluscs. *J Comp Neurol*. 2006 Nov; 499(3):485–505.
- 963 **Newcomb JM**, Sakurai A, Lillvis JL, Gunaratne CA, Katz PS. Homology and homoplasy of swimming behaviors  
964 and neural circuits in the Nudipleura (Mollusca, Gastropoda, Opisthobranchia). *Proceedings of the National*  
965 *Academy of Sciences*. 2012; 109 Suppl:10669–10676.
- 966 **Nieto MA**. The snail superfamily of zinc-finger transcription factors. *Nat Rev Mol Cell Biol*. 2002 Mar; 3(3):155–  
967 166.
- 968 **Nomaksteinsky M**, Kassabov S, Chettouh Z, Stoeklé HC, Bonnaud L, Fortin G, Kandel ER, Brunet JF. Ancient  
969 origin of somatic and visceral neurons. *BMC Biol*. 2013 Apr; 11:53.
- 970 **Oliver G**, Mailhos A, Wehr R, Copeland NG, Jenkins NA, Gruss P. Six3, a murine homologue of the sine oculis  
971 gene, demarcates the most anterior border of the developing neural plate and is expressed during eye  
972 development. *Development*. 1995 Dec; 121(12):4045–4055.
- 973 **Pende M**, Vadiwala K, Schmidbaur H, Stockinger AW, Murawala P, Saghafi S, Dekens MPS, Becker K, Revilla-I-  
974 Domingo R, Papadopoulos SC, Zurl M, Pasierbek P, Simakov O, Tanaka EM, Raible F, Dodt HU. A versatile  
975 depigmentation, clearing, and labeling method for exploring nervous system diversity. *Sci Adv*. 2020 May;  
976 6(22):eaba0365.
- 977 **Peter A**, Stick R. Evolutionary aspects in intermediate filament proteins. *Curr Opin Cell Biol*. 2015 Feb; 32:48–55.
- 978 **Petersen KR**, Streett DA, Gerritsen AT, Hunter SS, Settles ML. Super deduper, fast PCR duplicate detection  
979 in fastq files. In: *Proceedings of the 6th ACM Conference on Bioinformatics, Computational Biology and Health*  
980 *Informatics BCB '15*, New York, NY, USA: Association for Computing Machinery; 2015. p. 491–492.
- 981 **Pflugrad A**, Meir JY, Barnes TM, Miller DM 3rd. The Groucho-like transcription factor UNC-37 functions with  
982 the neural specificity gene unc-4 to govern motor neuron identity in *C. elegans*. *Development*. 1997 May;  
983 124(9):1699–1709.

- 984 **Price MN**, Dehal PS, Arkin AP. FastTree 2—approximately maximum-likelihood trees for large alignments. *PLoS*  
985 *One*. 2010 Mar; 5(3):e9490.
- 986 **Rocha JJ**, Jayaram SA, Stevens TJ, Muschalik N, Shah RD, Emran S, Robles C, Freeman M, Munro S. Functional unk-  
987 nomics: Systematic screening of conserved genes of unknown function. *PLoS Biol*. 2023 Aug; 21(8):e300222.
- 988 **Sakurai A**, Katz PS. Artificial Synaptic Rewiring Demonstrates that Distinct Neural Circuit Configurations Un-  
989 derlie Homologous Behaviors. *Curr Biol*. 2017 Jun; 27(12):1721–1734.e3.
- 990 **Santos Pd**, Gehlen G, Faccioni-Heuser MC, Zancan DM, Achaval M. Distribution of glial cells in the central  
991 nervous system of the pulmonate snail *Megalobulimus oblongus* identified by means of a glial fibrillary acidic  
992 protein marker. *Acta Zool*. 2002 Oct; 83(4):345–351.
- 993 **Schultz LM**, Clark GA. GABA-induced synaptic facilitation at type B to A photoreceptor connections in *Hermis-*  
994 *senda*. *Brain Res Bull*. 1997; 42(5):377–383.
- 995 **Schulz MH**, Zerbino DR, Vingron M, Birney E. Oases: robust de novo RNA-seq assembly across the dynamic  
996 range of expression levels. *Bioinformatics*. 2012 Apr; 28(8):1086–1092.
- 997 **Seidel B**, Dong W, Savaria D, Zheng M, Pintar JE, Day R. Neuroendocrine protein 7B2 is essential for proteolytic  
998 conversion and activation of proprotein convertase 2 in vivo. *DNA Cell Biol*. 1998 Dec; 17(12):1017–1029.
- 999 **Seimiya M**, Gehring WJ. The *Drosophila* homeobox gene *optix* is capable of inducing ectopic eyes by an eyeless-  
1000 independent mechanism. *Development*. 2000 May; 127(9):1879–1886.
- 1001 **Seo HC**, Drivenes, Ellingsen S, Fjose A. Expression of two zebrafish homologues of the murine *Six3* gene de-  
1002 marcatates the initial eye primordia. *Mech Dev*. 1998 Apr; 73(1):45–57.
- 1003 **Sinigaglia C**, Thiel D, Hejnal A, Houliston E, Leclère L. A safer, urea-based in situ hybridization method improves  
1004 detection of gene expression in diverse animal species. *Dev Biol*. 2018 Feb; 434(1):15–23.
- 1005 **Smith-Unna R**, Boursnell C, Patro R, Hibberd JM, Kelly S. TransRate: reference-free quality assessment of de  
1006 novo transcriptome assemblies. *Genome Res*. 2016 Aug; 26(8):1134–1144.
- 1007 **Songco-Casey JO**, Coffing GC, Piscopo DM, Pungor JR, Kern AD, Miller AC, Niell CM. Cell types and molecular  
1008 architecture of the *Octopus bimaculoides* visual system. *Curr Biol*. 2022 Dec; 32(23):5031–5044.e4.
- 1009 **Spijker S**, Smit AB, Sharp-Baker HE, Van Elk R, Van Kesteren ER, Van Minnen J, Kurosky A, Geraerts WP. Family  
1010 of prohormone convertases in *Lymnaea*: characterization of two alternatively spliced furin-like transcripts  
1011 and cell-specific regulation of their expression. *J Neurobiol*. 1999 Nov; 41(3):399–413.
- 1012 **Storch V**, Welsch U. Über Bau und Funktion der Nudibranchier-Rhinophoren. *Cell Tissue Res*. 1969; .
- 1013 **Stothard P**. The sequence manipulation suite: JavaScript programs for analyzing and formatting protein and  
1014 DNA sequences. *Biotechniques*. 2000 Jun; 28(6):1102, 1104.
- 1015 **Stump G**, Durrer A, Klein AL, Lütolf S, Suter U, Taylor V. Notch1 and its ligands Delta-like and Jagged are ex-  
1016 pressed and active in distinct cell populations in the postnatal mouse brain. *Mech Dev*. 2002 Jun; 114(1-  
1017 2):153–159.
- 1018 **Styfals R**, Zolotarov G, Hulselmans G, Spanier KI, Poovathingal S, Elagoz AM, De Winter S, Deryckere A, Rajew-  
1019 sky N, Ponte G, Fiorito G, Aerts S, Seuntjens E. Cell type diversity in a developing octopus brain. *Nat Commun*.  
1020 2022 Nov; 13(1):7392.
- 1021 **Tasic B**. Single cell transcriptomics in neuroscience: cell classification and beyond. *Curr Opin Neurobiol*. 2018  
1022 Jun; 50:242–249.
- 1023 **Thiel D**, Yañez-Guerra LA, Franz-Wachtel M, Hejnal A, Jékely G. Nemertean, Brachiopod, and Phoronid Neu-  
1024 ropeptidomics Reveals Ancestral Spiralian Signaling Systems. *Mol Biol Evol*. 2021 Oct; 38(11):4847–4866.
- 1025 **Tosches MA**, Yamawaki TM, Naumann RK, Jacobi AA, Tushev G, Laurent G. Evolution of pallium, hippocampus,  
1026 and cortical cell types revealed by single-cell transcriptomics in reptiles. *Science*. 2018 May; 360(6391):881–  
1027 888.
- 1028 **Veenstra JA**. Neurohormones and neuropeptides encoded by the genome of *Lottia gigantea*, with reference  
1029 to other mollusks and insects. *Gen Comp Endocrinol*. 2010 May; 167(1):86–103.



- 1030 **Vergara HM**, Bertucci PY, Hantz P, Tosches MA, Achim K, Vopalensky P, Arendt D. Whole-organism cellular  
1031 gene-expression atlas reveals conserved cell types in the ventral nerve cord of *Platynereis dumerilii*. *Proc*  
1032 *Natl Acad Sci U S A*. 2017 Jun; 114(23):5878–5885.
- 1033 **Walters ET**, Bodnarova M, Billy AJ, others. Somatotopic organization and functional properties of mechanosen-  
1034 sory neurons expressing sensorin-A mRNA in *Aplysia californica*. *Journal of*. 2004; .
- 1035 **Watkins KL**. Chemosensory Receptors in *Berghia stephanieae*: Bioinformatics and Localization. PhD thesis,  
1036 University of Massachusetts Amherst; 2022.
- 1037 **Wertz A**, Rössler W, Obermayer M, Bickmeyer U. Functional neuroanatomy of the rhinophore of *Aplysia punc-*  
1038 *tata*. *Front Zool*. 2006 Apr; 3:6.
- 1039 **Whitesel CA**. Studying the Central and Peripheral Nervous Systems in larval and juvenile *Berghia stephanieae*.  
1040 PhD thesis, UC San Diego; 2021.
- 1041 **Williams EA**, Verasztó C, Jasek S, Conzelmann M, Shahidi R, Bauknecht P, Mirabeau O, Jékely G. Synaptic and  
1042 peptidergic connectome of a neurosecretory center in the annelid brain. *Elife*. 2017 Dec; 6.
- 1043 **Xie Y**, Wu G, Tang J, Luo R, Patterson J, Liu S, Huang W, He G, Gu S, Li S, Zhou X, Lam TW, Li Y, Xu X, Wong GKS,  
1044 Wang J. SOAPdenovo-Trans: de novo transcriptome assembly with short RNA-Seq reads. *Bioinformatics*.  
1045 2014 Jun; 30(12):1660–1666.
- 1046 **Xiong WC**, Okano H, Patel NH, Blendy JA, Montell C. *repo* encodes a glial-specific homeo domain protein re-  
1047 quired in the *Drosophila* nervous system. *Genes Dev*. 1994 Apr; 8(8):981–994.
- 1048 **Yeoman MS**, Pieneman AW, Ferguson GP, Ter Maat A, Benjamin PR. Modulatory role for the serotonergic  
1049 cerebral giant cells in the feeding system of the snail, *Lymnaea*. I. Fine wire recording in the intact animal  
1050 and pharmacology. *J Neurophysiol*. 1994 Sep; 72(3):1357–1371.
- 1051 **Yin J**, Spillman E, Cheng ES, Short J, Chen Y, Lei J, Gibbs M, Rosenthal JS, Sheng C, Chen YX, Veerasammy K,  
1052 Choetso T, Abzalimov R, Wang B, Han C, He Y, Yuan Q. Brain-specific lipoprotein receptors interact with as-  
1053 trocyte derived apolipoprotein and mediate neuron-glia lipid shuttling. *Nat Commun*. 2021 Apr; 12(1):2408.
- 1054 **Zappia L**, Oshlack A. Clustering trees: a visualization for evaluating clusterings at multiple resolutions. *Giga-*  
1055 *science*. 2018 Jul; 7(7).
- 1056 **Zhang H**, Wainwright M, Byrne JH, Cleary LJ. Quantitation of contacts among sensory, motor, and serotonergic  
1057 neurons in the pedal ganglion of *aplysia*. *Learn Mem*. 2003; 10(5):387–393.

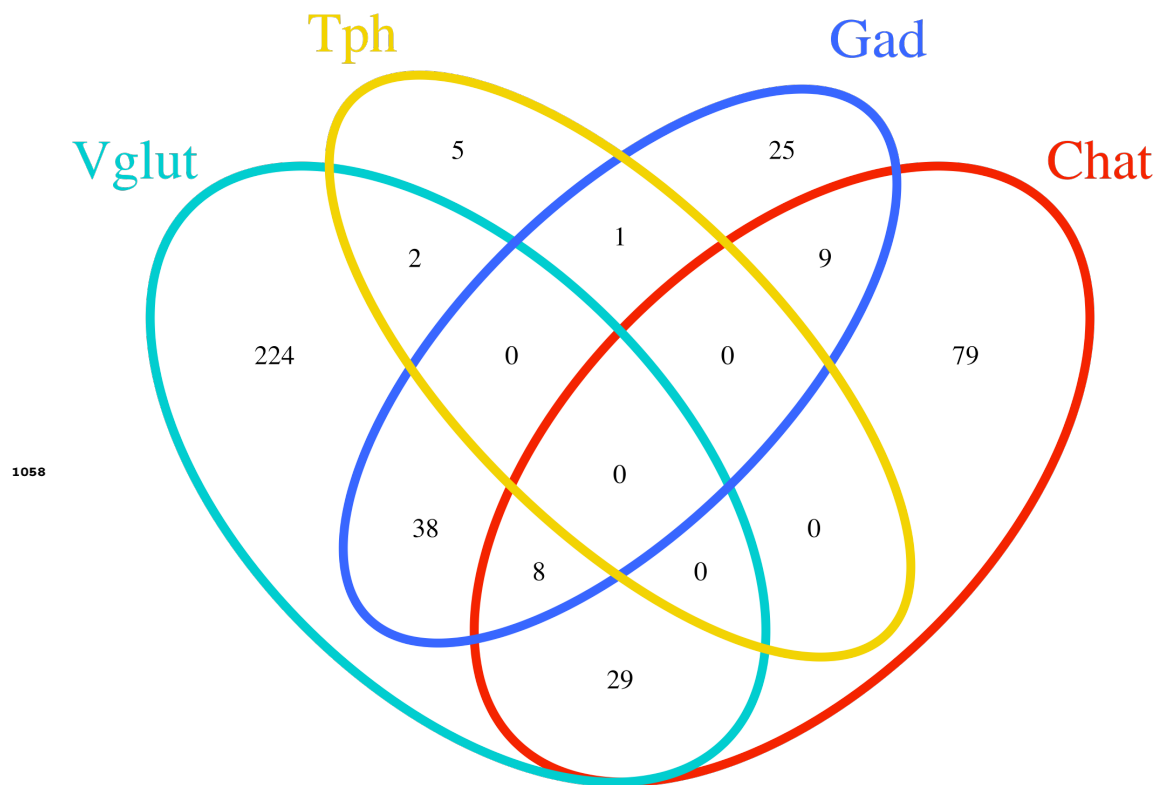

**Figure 6–Figure supplement 1.** Venn diagram showing the numbers of neurons expressing *Vglut*, *Tph*, *Gad*, and *Chat*, singularly or in combinations. Most neurons express only 1 gene associated with a specific neurotransmitter. *Vglut* shares expression with the largest number of either *Gad*<sup>+</sup> or *Chat*<sup>+</sup> cells.
